# Supplementary material for: Mesoionic compounds: the role of intermolecular interactions in their crystalline design
Source: Royal Society of Chemistry journal article supplement (doi:10.1039/d3ce00554b), 2023-01-01
Supplement: d3ce00554b1.pdf [file d3ce00554b1.pdf]

## SUPPORTING INFORMATION

# MESOIONIC COMPOUNDS: THE ROLE OF INTERMOLECULAR INTERACTIONS IN THEIR CRYSTALLINE DESIGN

Priscila S. V. de Lima,<sup>1</sup> Gustavo H. Weimer,<sup>1</sup> Leonardo Pereira de Oliveira,<sup>1</sup> Helivaldo D. S. Souza,<sup>2</sup> Gabriela F. Fiss,<sup>2</sup> Helio G. Bonaccorso,<sup>1</sup> and Marcos A. P. Martins<sup>1\*</sup>

<sup>1</sup>Núcleo de Química de Heterociclos (NUQUIMHE), Department of Chemistry, Federal University of Santa Maria (UFSM), 97105-900, Santa Maria, RS, Brazil.

<sup>2</sup>Laboratório de Pesquisa em Bioenergia e Síntese Orgânica (LPBS), Department of Chemistry, Federal University of Paraíba (UFPB), João Pessoa, PB, Brazil.

\*E-mail: [marcos.nuquimhe@gmail.com](mailto:marcos.nuquimhe@gmail.com)

### Summary

|                                                                              |    |
|------------------------------------------------------------------------------|----|
| 1. Synthesis of the mesoionic 1,3,4-thiadiazolium-5-thiolate (18) .....      | 2  |
| 2. Crystallographic data .....                                               | 3  |
| 3. Symmetry Codes, Contact Area, Stabilization Energy and Normalized Data... | 4  |
| 4. Normalized Data.....                                                      | 27 |
| 5. Supramolecular cluster data, CEE and CPE data.....                        | 31 |
| 6. Crystallization Mechanisms .....                                          | 33 |
| 7. Molecular Electrostatic Potential (MEP).....                              | 42 |
| 8. Quantum Theory of Atoms in Molecules (QTAIM) .....                        | 45 |
| 9. References .....                                                          | 47 |

## 1. Synthesis of the mesoionic 1,3,4-thiadiazolium-5-thiolate (**18**)

The synthesis of mesoionic 1,3,4-thiadiazolium-5-thiolate (**18**) was initiated by the reaction of phenylhydrazine with CS<sub>2</sub> and KOH to form potassium β-phenyl-carbazoate. Potassium β-phenyl-carbazoate was reacted with benzoyl chloride giving the mesoionic system (**18**). Yield = 60% (Scheme 1).<sup>1</sup>

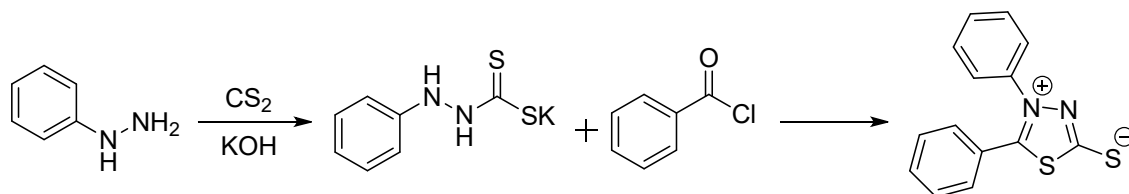

Scheme 1 Synthesis of the mesoionic 1,3,4-thiadiazolium-5-thiolate (**18**).

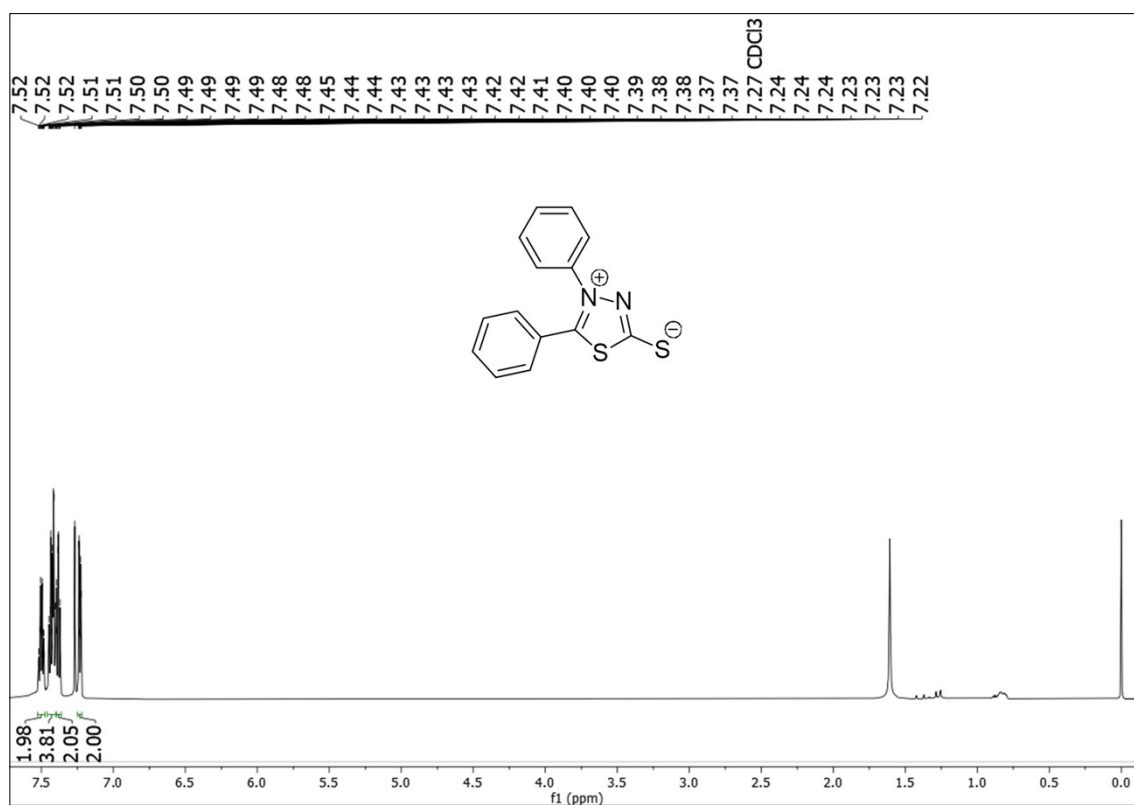

Figure S1 <sup>1</sup>H NMR spectra (CDCl<sub>3</sub>, 600.13 MHz) for compound 1,3,4-thiadiazolium-5-thiolate (**18**)

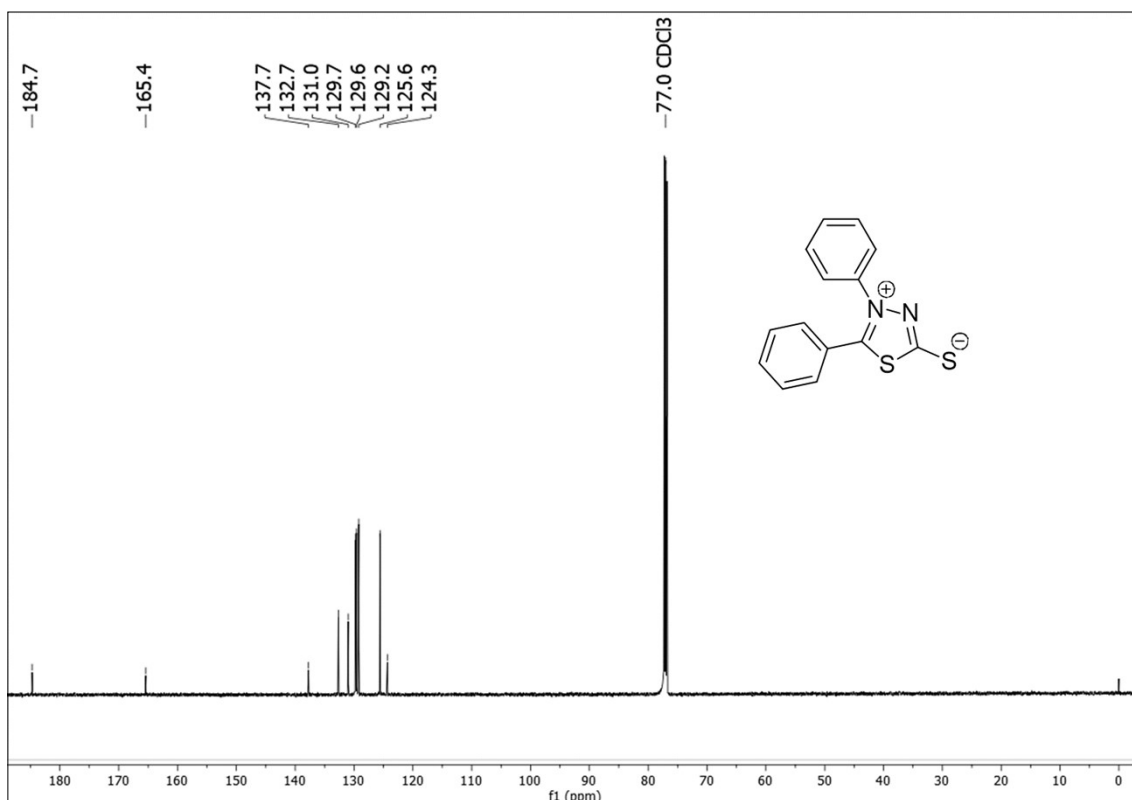

Figure S2  $^{13}\text{C}$  NMR spectra ( $\text{CDCl}_3$ , 150.90 MHz) for compound 1,3,4-thiadiazolium-5-thiolate (**18**)

## 2. Crystallographic data

Table S1 Crystal data for compound **18**

| Compound                                  | <b>18</b>                                        |
|-------------------------------------------|--------------------------------------------------|
| CCDC Number                               | 1835915                                          |
| Empirical formula                         | $\text{C}_{14}\text{H}_{10}\text{N}_2\text{S}_2$ |
| Formula weight                            | 270.36                                           |
| Crystal system                            | monoclinic                                       |
| Space group                               | $\text{P2}_1/\text{n}$                           |
| A (Å)                                     | 8.7734(3)                                        |
| b (Å)                                     | 10.4120(3)                                       |
| c (Å)                                     | 14.0300(5)                                       |
| a (degree)                                | 90                                               |
| $\beta$ (degree)                          | 97.5020(10)                                      |
| $\gamma$ (degree)                         | 90                                               |
| Volume (Å <sup>3</sup> )                  | 1270.65(7)                                       |
| Z                                         | 4                                                |
| T (K)                                     | 296.15                                           |
| $\rho_{\text{calc}}$ (g/cm <sup>3</sup> ) | 1.413                                            |
| $\mu$ (mm <sup>-1</sup> )                 | 3.636                                            |
| Reflections collected                     | 16780                                            |

|                                                               |                                                                  |
|---------------------------------------------------------------|------------------------------------------------------------------|
| Independent reflections                                       | 2255 [ $R_{\text{int}} = 0.0375$ , $R_{\text{sigma}} = 0.0186$ ] |
| Goodness-of-fit                                               | 1.054                                                            |
| $R_1$ [ $I \geq 2\sigma(I)$ ]                                 | 0.0339                                                           |
| $wR_2$ [ $I \geq 2\sigma(I)$ ]                                | 0.0893                                                           |
| $Dr_{\text{max.}}, Dr_{\text{min.}}$ ( $e \text{ \AA}^{-3}$ ) | 0.20/-0.22                                                       |

### 3. Symmetry Codes, Contact Area, Stabilization Energy and Normalized Data

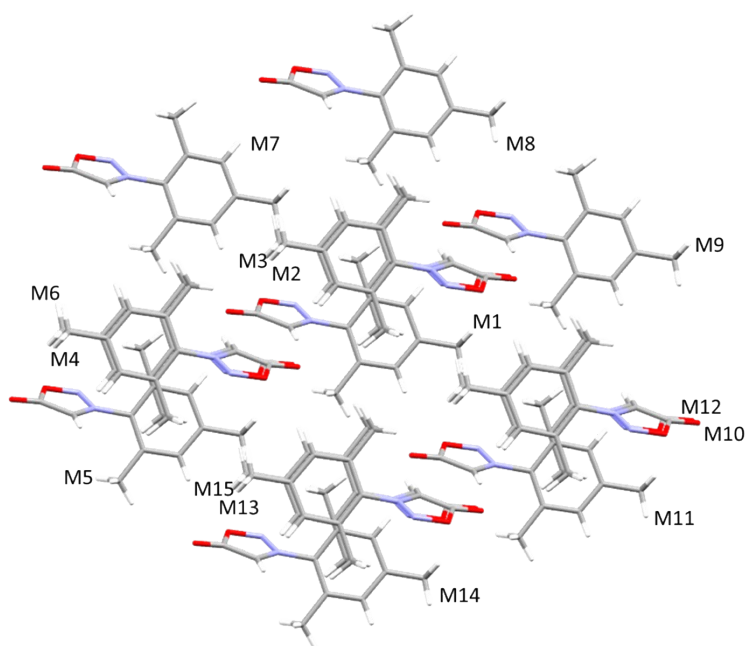

Figure S3 Supramolecular cluster of compound **1**

Table S2 Contact area and energetic data of each dimer from the supramolecular cluster of dimers of compound **1**

| Dimer           | Symmetry Code   | $C_{M1 \cdots MN}$<br>( $\text{\AA}^2$ ) | $G_{M1 \cdots MN}$<br>( $\text{kcal mol}^{-1}$ ) | $NC_{M1 \cdots MN}$ | $NG_{M1 \cdots MN}$ |
|-----------------|-----------------|------------------------------------------|--------------------------------------------------|---------------------|---------------------|
| M1              | $x, y, z$       |                                          |                                                  |                     |                     |
| M1 $\cdots$ M2  | $1-x, 1-y, 1-z$ | 50.92                                    | -11.08                                           | 2.62                | 2.47                |
| M1 $\cdots$ M3  | $-x, 1-y, 1-z$  | 42.1                                     | -10.44                                           | 2.16                | 2.33                |
| M1 $\cdots$ M4  | $x, -1+y, z$    | 21.84                                    | -4.94                                            | 1.12                | 1.10                |
| M1 $\cdots$ M5  | $x, y, 1+z$     | 9.04                                     | 0.21                                             | 0.46                | -0.05               |
| M1 $\cdots$ M6  | $x, 1+y, 1+z$   | 17.11                                    | -3.80                                            | 0.88                | 0.85                |
| M1 $\cdots$ M7  | $1-x, 2-y, 1-z$ | 13.37                                    | -1.33                                            | 0.69                | 0.30                |
| M1 $\cdots$ M8  | $x, 1+y, z$     | 21.84                                    | -4.94                                            | 1.12                | 1.10                |
| M1 $\cdots$ M9  | $-x, 2-y, 1-z$  | 7.43                                     | -0.76                                            | 0.38                | 0.17                |
| M1 $\cdots$ M10 | $1-x, 1-y, -z$  | 7.37                                     | -1.31                                            | 0.38                | 0.29                |
| M1 $\cdots$ M11 | $x, y, -1+z$    | 9.04                                     | 0.21                                             | 0.46                | -0.05               |
| M1 $\cdots$ M12 | $-x, 1-y, -z$   | 15.67                                    | -3.36                                            | 0.80                | 0.75                |



|                 |             |        |        |       |       |
|-----------------|-------------|--------|--------|-------|-------|
| M1 $\cdots$ M13 | 1-x,-y,-z   | 15.81  | -10.85 | 0.81  | 2.42  |
| M1 $\cdots$ M14 | x,-1+y,-1+z | 17.11  | -3.80  | 0.88  | 0.85  |
| M1 $\cdots$ M15 | -x,-y,-z    | 23.95  | -6.60  | 1.23  | 1.47  |
| Total           |             | 272.60 | -51.71 | 14.00 | 14.00 |

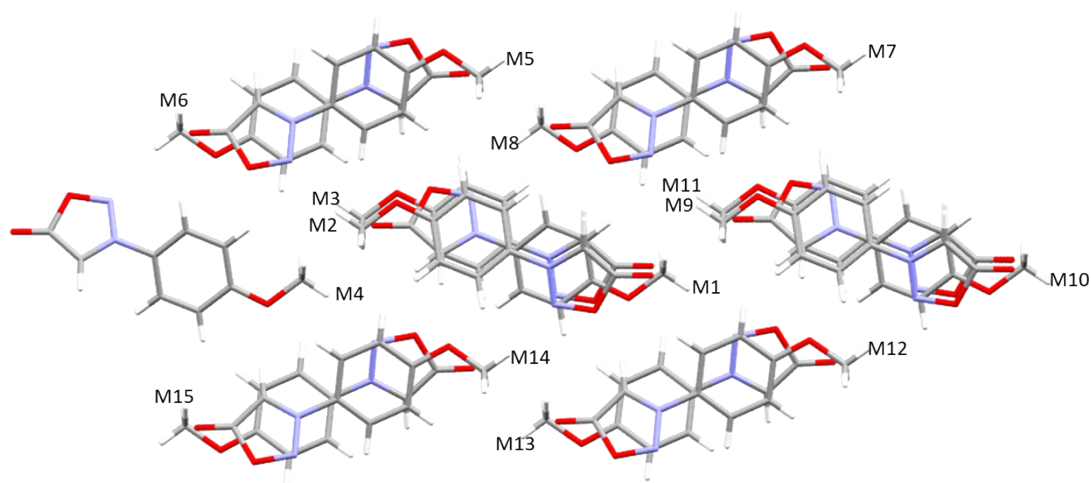

Figure S4 Supramolecular cluster of compound **2**

Table S3 Contact area and energetic data of each dimer from the supramolecular cluster of dimers of compound **2**

| Dimer           | Symmetry Code    | $C_{M1\cdots MN}$<br>( $\text{\AA}^2$ ) | $G_{M1\cdots MN}$<br>( $\text{kcal mol}^{-1}$ ) | $NC_{M1\cdots MN}$ | $NG_{M1\cdots MN}$ |
|-----------------|------------------|-----------------------------------------|-------------------------------------------------|--------------------|--------------------|
| M1              | x,y,z            |                                         |                                                 |                    |                    |
| M1 $\cdots$ M2  | 1/2+x,1.5-y,1-z  | 40.44                                   | -13.79                                          | 2.40               | 2.97               |
| M1 $\cdots$ M3  | -1/2+x,1.5-y,1-z | 40.44                                   | -13.79                                          | 2.40               | 2.97               |
| M1 $\cdots$ M4  | x,y,1+z          | 8.28                                    | -4.27                                           | 0.49               | 0.92               |
| M1 $\cdots$ M5  | 1/2-x,2-y,1/2+z  | 13.59                                   | -3.11                                           | 0.81               | 0.67               |
| M1 $\cdots$ M6  | -x,1/2+y,1.5-z   | 9.66                                    | -4.85                                           | 0.57               | 1.04               |
| M1 $\cdots$ M7  | 1/2-x,2-y,-1/2+z | 13.59                                   | -3.11                                           | 0.81               | 0.67               |
| M1 $\cdots$ M8  | -x,1/2+y,1/2-z   | 22.04                                   | -3.19                                           | 1.31               | 0.69               |
| M1 $\cdots$ M9  | 1/2+x,1.5-y,-z   | 4.17                                    | 0.57                                            | 0.25               | -0.12              |
| M1 $\cdots$ M10 | x,y,-1+z         | 8.28                                    | -4.27                                           | 0.49               | 0.92               |
| M1 $\cdots$ M11 | -1/2+x,1.5-y,-z  | 4.17                                    | 0.57                                            | 0.25               | -0.12              |
| M1 $\cdots$ M12 | 1/2-x,1-y,-1/2+z | 19.58                                   | -3.83                                           | 1.16               | 0.83               |
| M1 $\cdots$ M13 | -x,-1/2+y,1/2-z  | 22.04                                   | -3.19                                           | 1.31               | 0.69               |
| M1 $\cdots$ M14 | 1/2-x,1-y,1/2+z  | 19.58                                   | -3.83                                           | 1.16               | 0.83               |
| M1 $\cdots$ M15 | -x,-1/2+y,1.5-z  | 9.66                                    | -4.85                                           | 0.57               | 1.04               |
| Total           |                  | 235.52                                  | -51.16                                          | 14.00              | 14.00              |

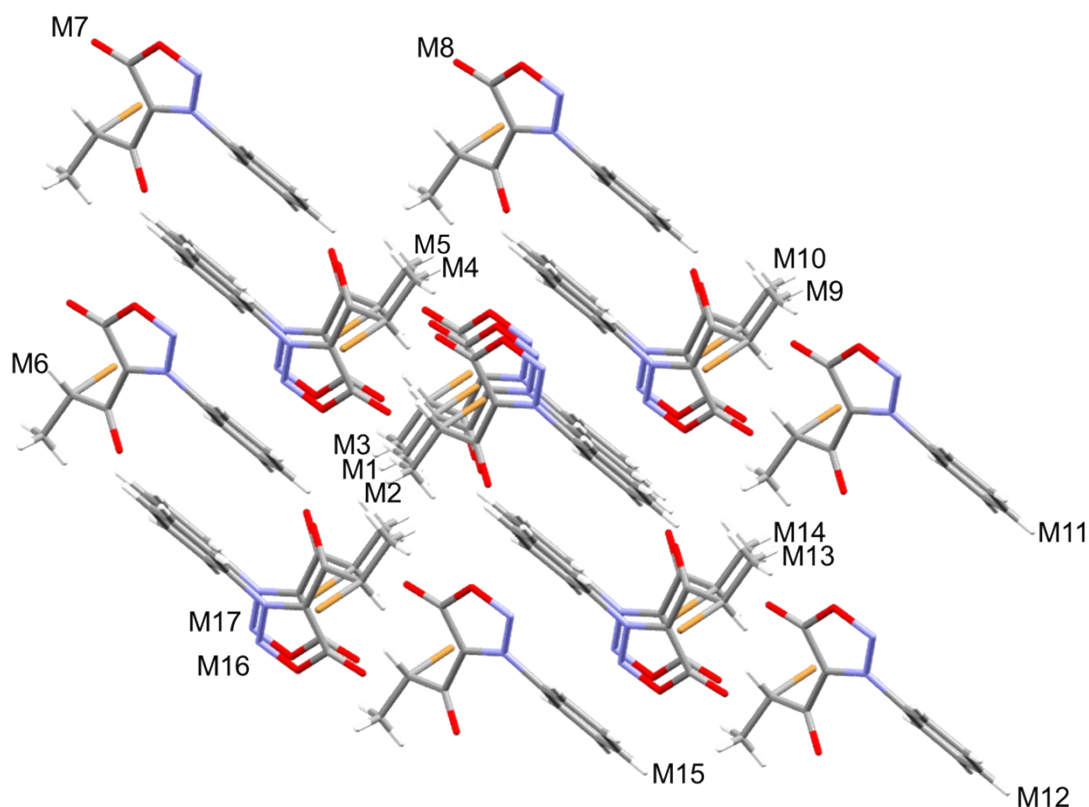

Figure S5 Supramolecular cluster of compound **3**

Table S4 Contact area and energetic data of each dimer from the supramolecular cluster of dimers of compound **3**

| Dimer           | Symmetry Code     | $C_{M1 \cdots MN}$<br>( $\text{\AA}^2$ ) | $G_{M1 \cdots MN}$<br>( $\text{kcal mol}^{-1}$ ) | $NC_{M1 \cdots MN}$ | $NG_{M1 \cdots MN}$ |
|-----------------|-------------------|------------------------------------------|--------------------------------------------------|---------------------|---------------------|
| M1              | $x, y, z$         |                                          |                                                  |                     |                     |
| M1 $\cdots$ M2  | $1+x, y, z$       | 13.41                                    | -1.79                                            | 0.73                | 0.49                |
| M1 $\cdots$ M3  | $-1+x, y, z$      | 13.41                                    | -1.79                                            | 0.73                | 0.49                |
| M1 $\cdots$ M4  | $1-x, 1-y, 2-z$   | 32.22                                    | -8.92                                            | 1.76                | 2.43                |
| M1 $\cdots$ M5  | $-x, 1-y, 2-z$    | 28.09                                    | -4.24                                            | 1.54                | 1.15                |
| M1 $\cdots$ M6  | $x, y, 1+z$       | 10.44                                    | -0.09                                            | 0.57                | 0.02                |
| M1 $\cdots$ M7  | $-1+x, y, 1+z$    | 1.70                                     | -1.22                                            | 0.09                | 0.33                |
| M1 $\cdots$ M8  | $x, 1+y, z$       | 7.13                                     | -0.74                                            | 0.39                | 0.20                |
| M1 $\cdots$ M9  | $2-x, 1-y, 1-z$   | 22.61                                    | -5.19                                            | 1.24                | 1.41                |
| M1 $\cdots$ M10 | $1-x, 1-y, 1-z$   | 43.97                                    | -11.57                                           | 2.41                | 3.15                |
| M1 $\cdots$ M11 | $1+x, y, -1+z$    | 10.44                                    | -0.82                                            | 0.57                | 0.22                |
| M1 $\cdots$ M12 | $1+x, -1+y, -1+z$ | 1.70                                     | -1.22                                            | 0.09                | 0.33                |
| M1 $\cdots$ M13 | $1+x, y, -1+z$    | 38.47                                    | -8.56                                            | 2.11                | 2.33                |
| M1 $\cdots$ M14 | $1-x, -y, 1-z$    | 44.84                                    | -7.80                                            | 2.46                | 2.12                |
| M1 $\cdots$ M15 | $x, -1+y, z$      | 7.13                                     | -0.74                                            | 0.39                | 0.20                |
| M1 $\cdots$ M16 | $1-x, -y, 2-z$    | 13.37                                    | -3.31                                            | 0.73                | 0.90                |
| M1 $\cdots$ M17 | $-x, -y, 2-z$     | 3.22                                     | -0.82                                            | 0.18                | 0.22                |
| Total           |                   | 292.15                                   | -58.83                                           | 16.00               | 16.00               |

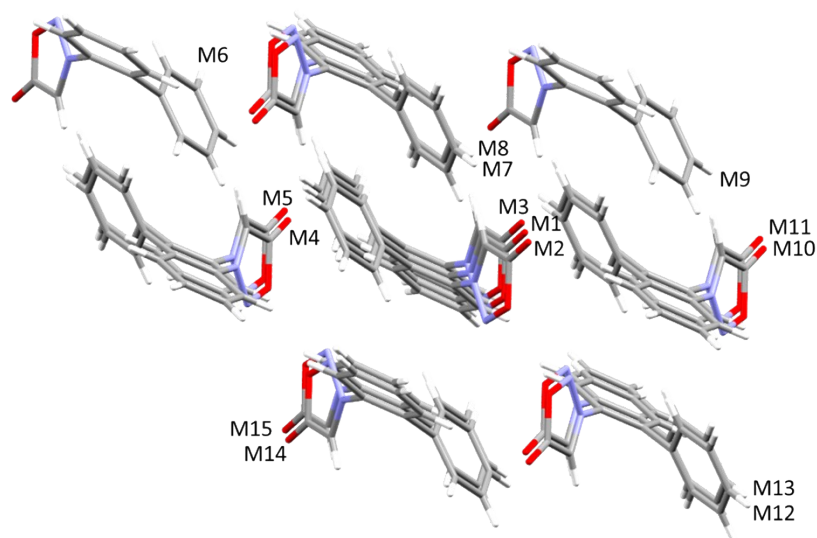

Figure S6 Supramolecular cluster of compound **4**

Table S5 Contact area and energetic data of each dimer from the supramolecular cluster of dimers of compound **4**

| Dimer           | Symmetry Code           | $C_{M1 \cdots MN}$<br>( $\text{\AA}^2$ ) | $G_{M1 \cdots MN}$<br>( $\text{kcal mol}^{-1}$ ) | $NC_{M1 \cdots MN}$ | $NG_{M1 \cdots MN}$ |
|-----------------|-------------------------|------------------------------------------|--------------------------------------------------|---------------------|---------------------|
| M1              | $x, y, z$               |                                          |                                                  |                     |                     |
| M1 $\cdots$ M2  | $x, 1+y, z$             | 21.74                                    | -3.40                                            | 1.04                | 0.71                |
| M1 $\cdots$ M3  | $x, -1+y, z$            | 21.74                                    | -3.40                                            | 1.04                | 0.71                |
| M1 $\cdots$ M4  | $-1/2+x, 2.5-y, -1/2+z$ | 6.94                                     | -2.91                                            | 0.33                | 0.60                |
| M1 $\cdots$ M5  | $-1/2+x, 1.5-y, -1/2+z$ | 29.29                                    | -8.27                                            | 1.41                | 1.72                |
| M1 $\cdots$ M6  | $-x, 2-y, 1-z$          | 11.07                                    | -1.29                                            | 0.53                | 0.27                |
| M1 $\cdots$ M7  | $1/2-x, 1/2+y, 1.5-z$   | 37.55                                    | -6.27                                            | 1.80                | 1.30                |
| M1 $\cdots$ M8  | $1/2-x, -1/2+y, 1.5-z$  | 37.55                                    | -6.27                                            | 1.80                | 1.30                |
| M1 $\cdots$ M9  | $1-x, 2-y, 2-z$         | 12.33                                    | -8.25                                            | 0.59                | 1.72                |
| M1 $\cdots$ M10 | $1/2+x, 2.5-y, 1/2+z$   | 6.94                                     | -2.91                                            | 0.33                | 0.60                |
| M1 $\cdots$ M11 | $1/2+x, 1.5-y, 1/2+z$   | 29.29                                    | -8.27                                            | 1.41                | 1.72                |
| M1 $\cdots$ M12 | $1/2-x, 1/2+y, 2.5-z$   | 11.63                                    | -1.35                                            | 0.56                | 0.28                |
| M1 $\cdots$ M13 | $1/2-x, -1/2+y, 2.5-z$  | 11.63                                    | -1.35                                            | 0.56                | 0.28                |
| M1 $\cdots$ M14 | $-x, 2-y, 2-z$          | 14.93                                    | -4.71                                            | 0.72                | 0.98                |
| M1 $\cdots$ M15 | $-x, 1-y, 2-z$          | 39.10                                    | -8.69                                            | 1.88                | 1.81                |
| Total           |                         | 291.73                                   | -63.93                                           | 14.00               | 14.00               |

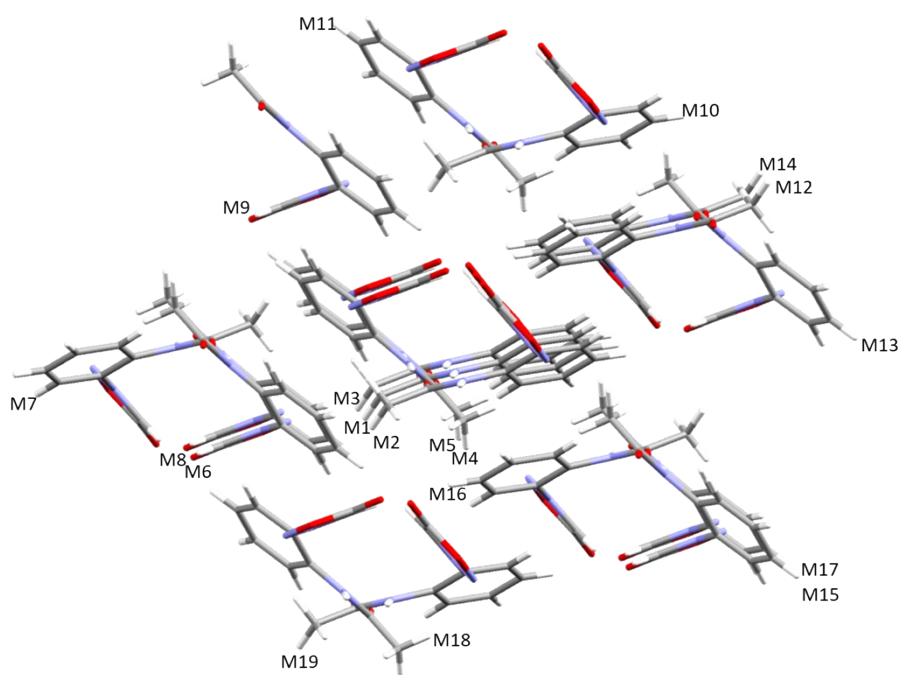

Figure S7 Supramolecular cluster of compound **5**

Table S6 Contact area and energetic data of each dimer from the supramolecular cluster of dimers of compound **5**

| Dimer           | Symmetry Code         | $C_{M1 \cdots MN}$<br>( $\text{\AA}^2$ ) | $G_{M1 \cdots MN}$<br>( $\text{kcal mol}^{-1}$ ) | $NC_{M1 \cdots MN}$ | $NG_{M1 \cdots MN}$ |
|-----------------|-----------------------|------------------------------------------|--------------------------------------------------|---------------------|---------------------|
| M1              | $x, y, z$             |                                          |                                                  |                     |                     |
| M1 $\cdots$ M2  | $x, y, 1+z$           | 1.96                                     | -0.89                                            | 0.13                | 0.21                |
| M1 $\cdots$ M3  | $x, y, -1+z$          | 1.96                                     | -0.89                                            | 0.13                | 0.21                |
| M1 $\cdots$ M4  | $x, 1/2-y, 1/2+z$     | 42.92                                    | -15.56                                           | 2.82                | 3.75                |
| M1 $\cdots$ M5  | $x, 1/2-y, -1/2+z$    | 42.92                                    | -15.56                                           | 2.82                | 3.75                |
| M1 $\cdots$ M6  | $1-x, 1/2+y, 1/2-z$   | 8.53                                     | -1.86                                            | 0.56                | 0.45                |
| M1 $\cdots$ M7  | $1-x, 1-y, -z$        | 3.51                                     | -0.29                                            | 0.23                | 0.07                |
| M1 $\cdots$ M8  | $1-x, 1/2+y, -1/2-z$  | 8.78                                     | -1.17                                            | 0.58                | 0.28                |
| M1 $\cdots$ M9  | $2-x, 1/2+y, 1/2-z$   | 11.96                                    | -2.93                                            | 0.79                | 0.71                |
| M1 $\cdots$ M10 | $1+x, y, 1+z$         | 0.36                                     | -0.64                                            | 0.02                | 0.15                |
| M1 $\cdots$ M11 | $1+x, 1/2-y, 1/2+z$   | 11.59                                    | -2.85                                            | 0.76                | 0.69                |
| M1 $\cdots$ M12 | $2-x, -y, 1-z$        | 25.89                                    | -9.52                                            | 1.70                | 2.29                |
| M1 $\cdots$ M13 | $2-x, -1/2+y, 1/2-z$  | 11.96                                    | -2.93                                            | 0.79                | 0.71                |
| M1 $\cdots$ M14 | $2-x, -y, -z$         | 29.22                                    | -4.88                                            | 1.92                | 1.17                |
| M1 $\cdots$ M15 | $1-x, -1/2+y, 1/2-z$  | 8.53                                     | -1.86                                            | 0.56                | 0.45                |
| M1 $\cdots$ M16 | $1-x, -y, -z$         | 43.14                                    | -8.26                                            | 2.83                | 1.99                |
| M1 $\cdots$ M17 | $1-x, -1/2+y, -1/2-z$ | 8.78                                     | -1.17                                            | 0.58                | 0.28                |
| M1 $\cdots$ M18 | $-1+x, 1/2-y, -1/2+z$ | 11.59                                    | -2.85                                            | 0.76                | 0.69                |
| M1 $\cdots$ M19 | $-1+x, y, -1+z$       | 0.36                                     | -0.64                                            | 0.02                | 0.15                |
| Total           |                       | 273.96                                   | -73.86                                           | 18.00               | 18.00               |

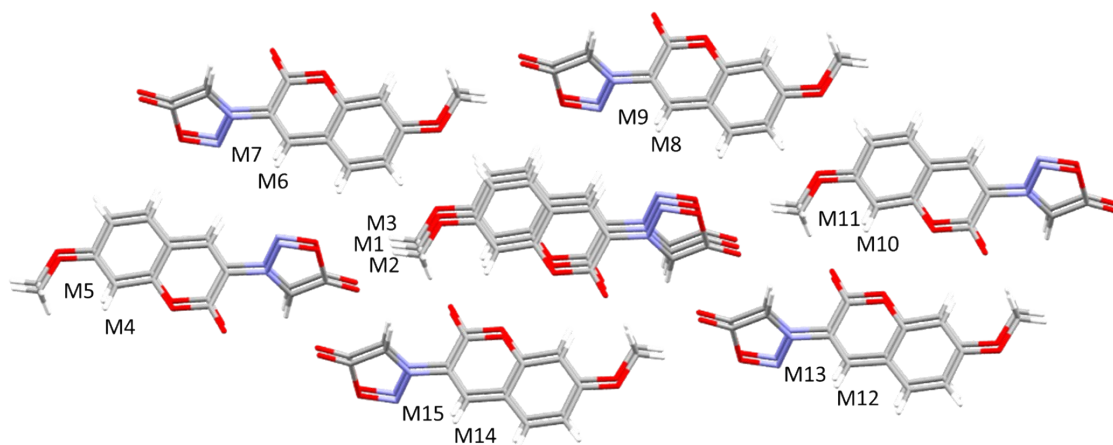

Figure S8 Supramolecular cluster of compound **6**

Table S7 Contact area and energetic data of each dimer from the supramolecular cluster of dimers of compound **6**

| Dimer           | Symmetry Code      | $C_{M1 \cdots MN}$<br>( $\text{\AA}^2$ ) | $G_{M1 \cdots MN}$<br>( $\text{kcal mol}^{-1}$ ) | $NC_{M1 \cdots MN}$ | $NG_{M1 \cdots MN}$ |
|-----------------|--------------------|------------------------------------------|--------------------------------------------------|---------------------|---------------------|
| M1              | $x, y, z$          |                                          |                                                  |                     |                     |
| M1 $\cdots$ M2  | $1+x, y, z$        | 57.7                                     | -10.82                                           | 2.81                | 1.86                |
| M1 $\cdots$ M3  | $-1+x, y, z$       | 57.7                                     | -10.82                                           | 2.81                | 1.86                |
| M1 $\cdots$ M4  | $x, -1+y, -1+z$    | 5.86                                     | -4.29                                            | 0.28                | 0.74                |
| M1 $\cdots$ M5  | $-1+x, -1+y, -1+z$ | 7.22                                     | -4.14                                            | 0.35                | 0.71                |
| M1 $\cdots$ M6  | $1-x, -y, 1-z$     | 21.65                                    | -0.91                                            | 1.05                | 0.16                |
| M1 $\cdots$ M7  | $-x, -y, 1-z$      | 14.78                                    | -1.49                                            | 0.72                | 0.26                |
| M1 $\cdots$ M8  | $2-x, 1-y, 2-z$    | 15.13                                    | -7.93                                            | 0.74                | 1.36                |
| M1 $\cdots$ M9  | $1-x, 1-y, 2-z$    | 23.37                                    | -8.56                                            | 1.14                | 1.47                |
| M1 $\cdots$ M10 | $1+x, 1+y, 1+z$    | 7.22                                     | -4.14                                            | 0.35                | 0.71                |
| M1 $\cdots$ M11 | $x, 1+y, 1+z$      | 5.86                                     | -4.29                                            | 0.28                | 0.74                |
| M1 $\cdots$ M12 | $2-x, 2-y, 2-z$    | 11.48                                    | -0.29                                            | 0.56                | 0.05                |
| M1 $\cdots$ M13 | $1-x, 2-y, 2-z$    | 11.56                                    | -6.15                                            | 0.56                | 1.05                |
| M1 $\cdots$ M14 | $2-x, 1-y, 1-z$    | 19.88                                    | -11.20                                           | 0.97                | 1.92                |
| M1 $\cdots$ M15 | $1-x, 1-y, 1-z$    | 28.47                                    | -6.62                                            | 1.38                | 1.14                |
| Total           |                    | 287.88                                   | -70.81                                           | 14.00               | 14.00               |

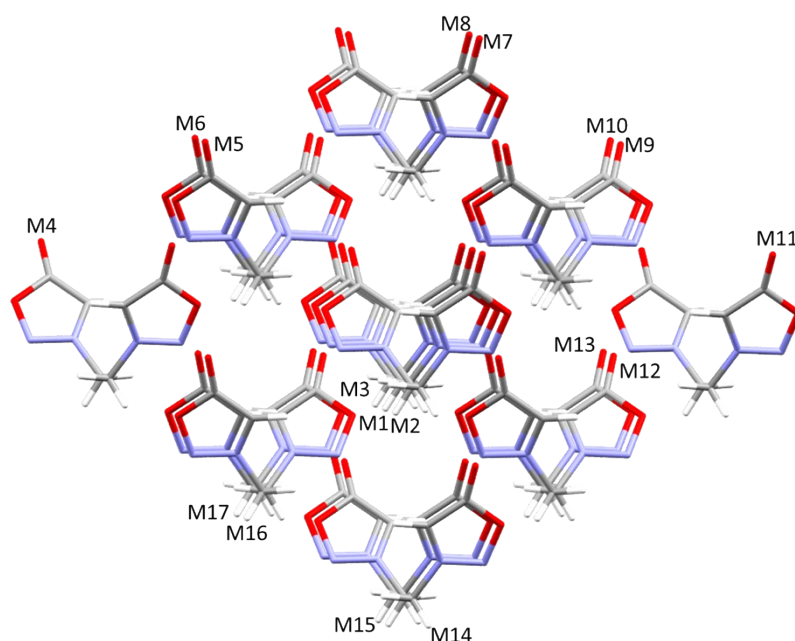

Figure S9 Supramolecular cluster of compound **7**

Table S8 Contact area and energetic data of each dimer from the supramolecular cluster of dimers of compound **7**

| Dimer           | Symmetry Code            | $C_{M1 \cdots MN}$<br>( $\text{\AA}^2$ ) | $G_{M1 \cdots MN}$<br>( $\text{kcal mol}^{-1}$ ) | $NC_{M1 \cdots MN}$ | $NG_{M1 \cdots MN}$ |
|-----------------|--------------------------|------------------------------------------|--------------------------------------------------|---------------------|---------------------|
| M1              | $x, y, z$                |                                          |                                                  |                     |                     |
| M1 $\cdots$ M2  | $x, 1+y, z$              | 10.29                                    | -0.32                                            | 0.72                | 0.08                |
| M1 $\cdots$ M3  | $x, -1+y, z$             | 10.29                                    | -0.29                                            | 0.72                | 0.08                |
| M1 $\cdots$ M4  | $-1/2+x, -1/2+y, z$      | 4.75                                     | 1.23                                             | 0.33                | -0.32               |
| M1 $\cdots$ M5  | $-1/4+x, 1/4-y, -1/4+z$  | 24.91                                    | -3.38                                            | 1.75                | 0.88                |
| M1 $\cdots$ M6  | $-1/4+x, -3/4-y, -1/4+z$ | 12.8                                     | -6.32                                            | 0.90                | 1.65                |
| M1 $\cdots$ M7  | $x, 1/2+y, -1/2+z$       | 11.55                                    | -6.05                                            | 0.81                | 1.58                |
| M1 $\cdots$ M8  | $x, -1/2+y, -1/2+z$      | 11.55                                    | -6.03                                            | 0.81                | 1.58                |
| M1 $\cdots$ M9  | $1/4+x, 3/4-y, -1/4+z$   | 12.8                                     | -6.32                                            | 0.90                | 1.65                |
| M1 $\cdots$ M10 | $1/4+x, -1/4-y, -1/4+z$  | 24.91                                    | -3.41                                            | 1.75                | 0.89                |
| M1 $\cdots$ M11 | $1/2+x, 1/2+y, z$        | 4.75                                     | 1.23                                             | 0.33                | -0.32               |
| M1 $\cdots$ M12 | $1/4+x, 1/4-y, 1/4+z$    | 24.91                                    | -3.38                                            | 1.75                | 0.88                |
| M1 $\cdots$ M13 | $1/4+x, -3/4-y, 1/4+z$   | 12.8                                     | -6.32                                            | 0.90                | 1.65                |
| M1 $\cdots$ M14 | $x, 1/2+y, 1/2+z$        | 11.55                                    | -6.05                                            | 0.81                | 1.58                |
| M1 $\cdots$ M15 | $x, -1/2+y, 1/2+z$       | 11.55                                    | -6.05                                            | 0.81                | 1.58                |
| M1 $\cdots$ M16 | $-1/4+x, 3/4-y, 1/4+z$   | 12.8                                     | -6.32                                            | 0.90                | 1.65                |
| M1 $\cdots$ M17 | $-1/4+x, -1/4-y, 1/4+z$  | 24.91                                    | -3.38                                            | 1.75                | 0.88                |
| Total           |                          | 227.12                                   | -60.86                                           | 16.00               | 16.00               |

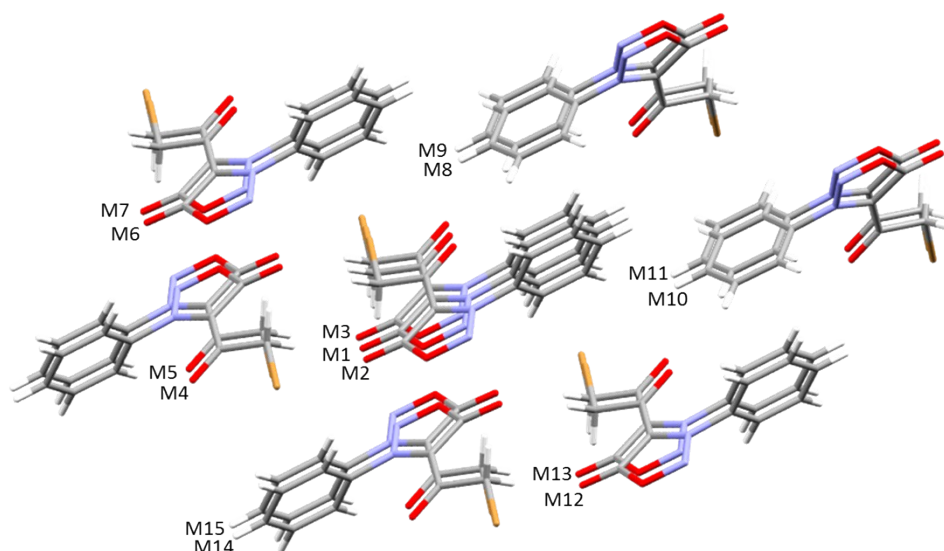

Figure S10 Supramolecular cluster of compound **8**

Table S9 Contact area and energetic data of each dimer from the supramolecular cluster of dimers of compound **8**

| Dimer           | Symmetry Code        | $C_{M1 \cdots MN}$<br>( $\text{\AA}^2$ ) | $G_{M1 \cdots MN}$<br>( $\text{kcal mol}^{-1}$ ) | $NC_{M1 \cdots MN}$ | $NG_{M1 \cdots MN}$ |
|-----------------|----------------------|------------------------------------------|--------------------------------------------------|---------------------|---------------------|
| M1              | $x, y, z$            |                                          |                                                  |                     |                     |
| M1 $\cdots$ M2  | $x, 1+y, z$          | 39.4                                     | -8.22                                            | 1.95                | 2.07                |
| M1 $\cdots$ M3  | $x, -1+y, z$         | 39.4                                     | -8.22                                            | 1.95                | 2.07                |
| M1 $\cdots$ M4  | $2-x, 2-y, -z$       | 15.39                                    | -4.16                                            | 0.76                | 1.05                |
| M1 $\cdots$ M5  | $2-x, 1-y, -z$       | 14.47                                    | -0.93                                            | 0.72                | 0.23                |
| M1 $\cdots$ M6  | $1+x, y, z$          | 15.09                                    | -3.63                                            | 0.75                | 0.91                |
| M1 $\cdots$ M7  | $1+x, -1+y, z$       | 10.37                                    | -2.02                                            | 0.51                | 0.51                |
| M1 $\cdots$ M8  | $1-x, 1/2+y, 1/2-z$  | 28.57                                    | -5.95                                            | 1.42                | 1.50                |
| M1 $\cdots$ M9  | $1-x, -1/2+y, 1/2-z$ | 28.57                                    | -5.95                                            | 1.42                | 1.50                |
| M1 $\cdots$ M10 | $-x, 1/2+y, 1/2-z$   | 12.23                                    | -0.38                                            | 0.61                | 0.09                |
| M1 $\cdots$ M11 | $-x, -1/2+y, 1/2-z$  | 12.23                                    | -0.38                                            | 0.61                | 0.09                |
| M1 $\cdots$ M12 | $-1+x, 1+y, z$       | 10.37                                    | -2.02                                            | 0.51                | 0.51                |
| M1 $\cdots$ M13 | $-1+x, y, z$         | 15.09                                    | -3.63                                            | 0.75                | 0.91                |
| M1 $\cdots$ M14 | $1-x, 3-y, -z$       | 6.95                                     | -0.13                                            | 0.34                | 0.03                |
| M1 $\cdots$ M15 | $1-x, 2-y, -z$       | 34.04                                    | -10.00                                           | 1.69                | 2.52                |
| Total           |                      | 282.17                                   | -47.39                                           | 14.00               | 14.00               |



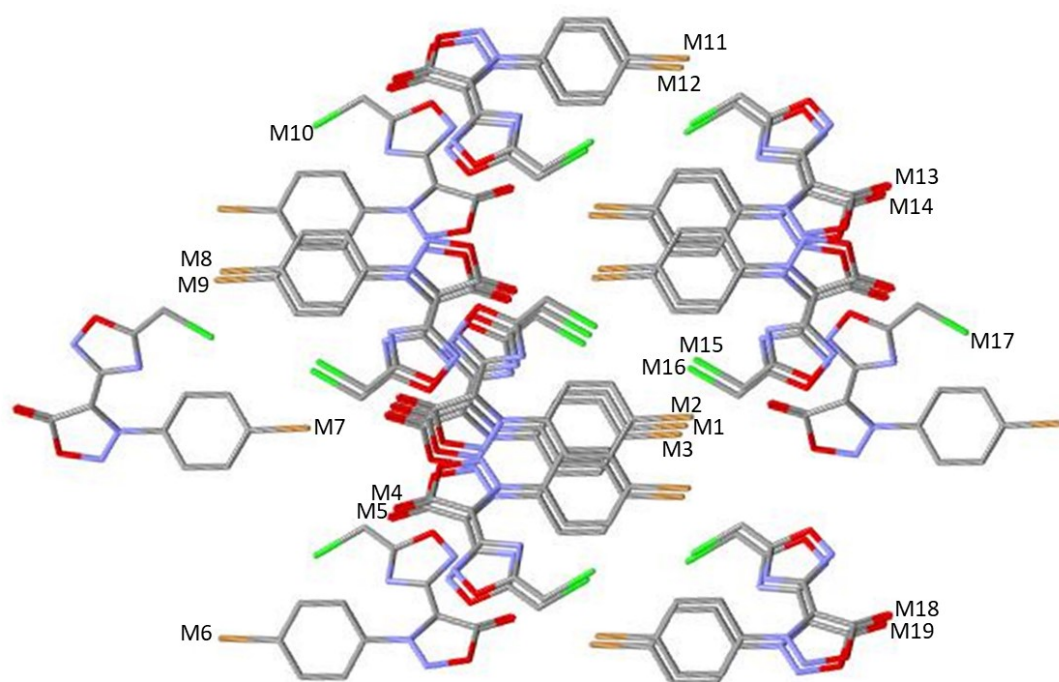

Figure S11 Supramolecular cluster of compound **9**

Table S10 Contact area and energetic data of each dimer from the supramolecular cluster of dimers of compound **9**

| Dimer           | Symmetry Code        | $C_{M_1 \cdots M_N}$<br>( $\text{\AA}^2$ ) | $G_{M_1 \cdots M_N}$<br>( $\text{kcal mol}^{-1}$ ) | $NC_{M_1 \cdots M_N}$ | $NG_{M_1 \cdots M_N}$ |
|-----------------|----------------------|--------------------------------------------|----------------------------------------------------|-----------------------|-----------------------|
| M1              | $x, y, z$            |                                            |                                                    |                       |                       |
| M1 $\cdots$ M2  | $x, y, -1+z$         | 8.58                                       | -0.92                                              | 0.47                  | 0.22                  |
| M1 $\cdots$ M3  | $x, y, 1+z$          | 8.58                                       | -0.92                                              | 0.47                  | 0.22                  |
| M1 $\cdots$ M4  | $x, 1.5-y, -1/2+z$   | 50.12                                      | -7.64                                              | 2.73                  | 1.81                  |
| M1 $\cdots$ M5  | $x, 1.5-y, 1/2+z$    | 50.12                                      | -7.64                                              | 2.73                  | 1.81                  |
| M1 $\cdots$ M6  | $1-x, 1/2+y, 1.5-z$  | 17.1                                       | -6.08                                              | 0.93                  | 1.44                  |
| M1 $\cdots$ M7  | $-1+x, y, z$         | 5.51                                       | -1.76                                              | 0.30                  | 0.42                  |
| M1 $\cdots$ M8  | $1-x, 1-y, 1-z$      | 32.57                                      | -12.93                                             | 1.78                  | 3.06                  |
| M1 $\cdots$ M9  | $1-x, 1-y, 2-z$      | 46.36                                      | -19.08                                             | 2.53                  | 4.52                  |
| M1 $\cdots$ M10 | $1-x, -1/2+y, 1.5-z$ | 17.1                                       | -6.08                                              | 0.93                  | 1.44                  |
| M1 $\cdots$ M11 | $x, 1/2-y, -1/2+z$   | 0.51                                       | 0.83                                               | 0.03                  | -0.20                 |
| M1 $\cdots$ M12 | $x, 1/2-y, 1/2+z$    | 0.51                                       | 0.83                                               | 0.03                  | -0.20                 |
| M1 $\cdots$ M13 | $2-x, -1/2+y, 1.5-z$ | 14.35                                      | -2.02                                              | 0.78                  | 0.48                  |
| M1 $\cdots$ M14 | $2-x, -1/2+y, 2.5-z$ | 1.22                                       | -0.17                                              | 0.07                  | 0.04                  |
| M1 $\cdots$ M15 | $2-x, 1-y, 1-z$      | 4.79                                       | -1.00                                              | 0.26                  | 0.24                  |
| M1 $\cdots$ M16 | $2-x, 1-y, 2-z$      | 51.64                                      | -7.52                                              | 2.82                  | 1.78                  |
| M1 $\cdots$ M17 | $1+x, y, z$          | 5.51                                       | -1.76                                              | 0.30                  | 0.42                  |
| M1 $\cdots$ M18 | $2-x, 1/2+y, 1.5-z$  | 14.35                                      | -2.02                                              | 0.78                  | 0.48                  |
| M1 $\cdots$ M19 | $2-x, 1/2+y, 2.5-z$  | 1.22                                       | -0.17                                              | 0.07                  | 0.04                  |
| Total           |                      | 330.14                                     | -76.05                                             | 18.00                 | 18.00                 |



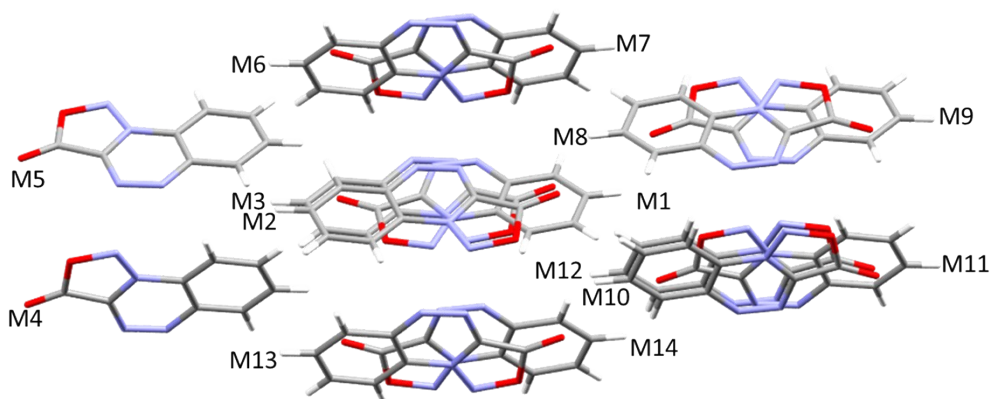

Figure S12 Supramolecular cluster of compound **10**

Table S11 Contact area and energetic data of each dimer from the supramolecular cluster of dimers of compound **10**

| Dimer           | Symmetry Code        | $C_{M1 \cdots MN}$<br>( $\text{\AA}^2$ ) | $G_{M1 \cdots MN}$<br>( $\text{kcal mol}^{-1}$ ) | $NC_{M1 \cdots MN}$ | $NG_{M1 \cdots MN}$ |
|-----------------|----------------------|------------------------------------------|--------------------------------------------------|---------------------|---------------------|
| M1              | $x, y, z$            |                                          |                                                  |                     |                     |
| M1 $\cdots$ M2  | $1.5-x, 1/2+y, z$    | 24.85                                    | -9.12                                            | 1.49                | 2.00                |
| M1 $\cdots$ M3  | $1.5-x, -1/2+y, z$   | 24.85                                    | -9.12                                            | 1.49                | 2.00                |
| M1 $\cdots$ M4  | $1/2+x, y, 1/2-z$    | 13.23                                    | -3.43                                            | 0.79                | 0.75                |
| M1 $\cdots$ M5  | $1/2+x, 1.5-y, 1-z$  | 9.22                                     | -4.04                                            | 0.55                | 0.89                |
| M1 $\cdots$ M6  | $1.5-x, 2-y, 1/2+z$  | 23.56                                    | -8.01                                            | 1.41                | 1.76                |
| M1 $\cdots$ M7  | $x, 1.5-y, 1/2+z$    | 21.25                                    | -4.35                                            | 1.27                | 0.96                |
| M1 $\cdots$ M8  | $1-x, 2-y, 1-z$      | 17.75                                    | -1.32                                            | 1.06                | 0.29                |
| M1 $\cdots$ M9  | $-1/2+x, 1.5-y, 1-z$ | 9.22                                     | -4.04                                            | 0.55                | 0.89                |
| M1 $\cdots$ M10 | $1-x, 1/2+y, 1/2-z$  | 7.71                                     | 0.03                                             | 0.46                | -0.01               |
| M1 $\cdots$ M11 | $-1/2+x, y, 1/2-z$   | 13.23                                    | -3.43                                            | 0.79                | 0.75                |
| M1 $\cdots$ M12 | $1-x, -1/2+y, 1/2-z$ | 7.71                                     | 0.03                                             | 0.46                | -0.01               |
| M1 $\cdots$ M13 | $1.5-x, 2-y, -1/2+z$ | 23.56                                    | -8.01                                            | 1.41                | 1.76                |
| M1 $\cdots$ M14 | $x, 1.5-y, -1/2+z$   | 21.25                                    | -4.35                                            | 1.27                | 0.96                |
| Total           |                      | 217.39                                   | -50.04                                           | 13.00               | 13.00               |

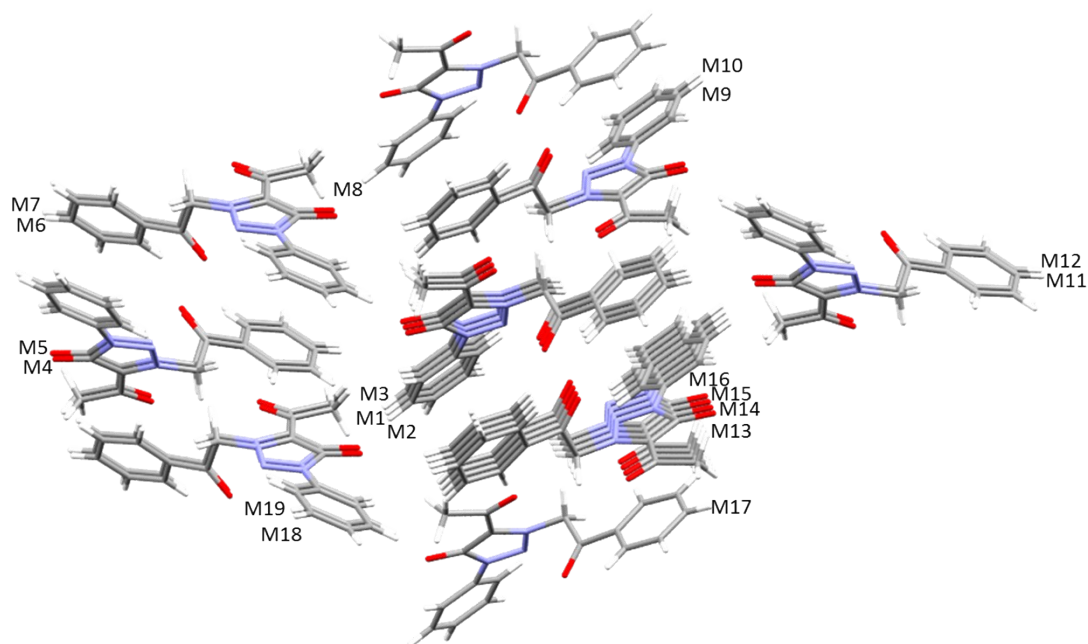

Figure S13 Supramolecular cluster of compound **11**

Table S12 Contact area and energetic data of each dimer from the supramolecular cluster of dimers of compound **11**

| Dimer           | Symmetry Code        | $C_{M1 \cdots MN}$<br>( $\text{\AA}^2$ ) | $G_{M1 \cdots MN}$<br>( $\text{kcal mol}^{-1}$ ) | $NC_{M1 \cdots MN}$ | $NG_{M1 \cdots MN}$ |
|-----------------|----------------------|------------------------------------------|--------------------------------------------------|---------------------|---------------------|
| M1              | $x, y, z$            |                                          |                                                  |                     |                     |
| M1 $\cdots$ M2  | $x, 1+y, z$          | 33.88                                    | -6.08                                            | 1.53                | 1.40                |
| M1 $\cdots$ M3  | $x, -1+y, z$         | 33.88                                    | -6.08                                            | 1.53                | 1.40                |
| M1 $\cdots$ M4  | $1.5-x, 2-y, -1/2+z$ | 8.45                                     | -2.29                                            | 0.38                | 0.53                |
| M1 $\cdots$ M5  | $1.5-x, 1-y, -1/2+z$ | 9.44                                     | -1.47                                            | 0.43                | 0.34                |
| M1 $\cdots$ M6  | $1/2+x, 1.5-y, -z$   | 14.82                                    | -1.60                                            | 0.67                | 0.37                |
| M1 $\cdots$ M7  | $1/2+x, 1/2-y, -z$   | 12.75                                    | -3.47                                            | 0.58                | 0.80                |
| M1 $\cdots$ M8  | $1+x, 1+y, z$        | 5.16                                     | -0.60                                            | 0.23                | 0.14                |
| M1 $\cdots$ M9  | $2-x, 1/2+y, 1/2-z$  | 57.22                                    | -13.06                                           | 2.59                | 3.01                |
| M1 $\cdots$ M10 | $2-x, -1/2+y, 1/2-z$ | 57.22                                    | -13.06                                           | 2.59                | 3.01                |
| M1 $\cdots$ M11 | $1.5-x, 2-y, 1/2+z$  | 8.45                                     | -2.29                                            | 0.38                | 0.53                |
| M1 $\cdots$ M12 | $1.5-x, 1-y, 1/2+z$  | 9.44                                     | -1.47                                            | 0.43                | 0.34                |
| M1 $\cdots$ M13 | $1-x, 1.5+y, 1/2-z$  | 12.73                                    | -0.70                                            | 0.58                | 0.16                |
| M1 $\cdots$ M14 | $1-x, 1/2+y, 1/2-z$  | 44.31                                    | -9.72                                            | 2.01                | 2.24                |
| M1 $\cdots$ M15 | $1-x, -1/2+y, 1/2-z$ | 44.31                                    | -9.72                                            | 2.01                | 2.24                |
| M1 $\cdots$ M16 | $1-x, -1.5+y, 1/2-z$ | 12.73                                    | -0.70                                            | 0.58                | 0.16                |
| M1 $\cdots$ M17 | $-1+x, -1+y, z$      | 5.16                                     | -0.60                                            | 0.23                | 0.14                |
| M1 $\cdots$ M18 | $-1/2+x, 1.5-y, -z$  | 14.82                                    | -1.60                                            | 0.67                | 0.37                |
| M1 $\cdots$ M19 | $-1/2+x, 1/2-y, -z$  | 12.75                                    | -3.47                                            | 0.58                | 0.80                |
| Total           |                      | 397.52                                   | -68.42                                           | 18.00               | 18.00               |

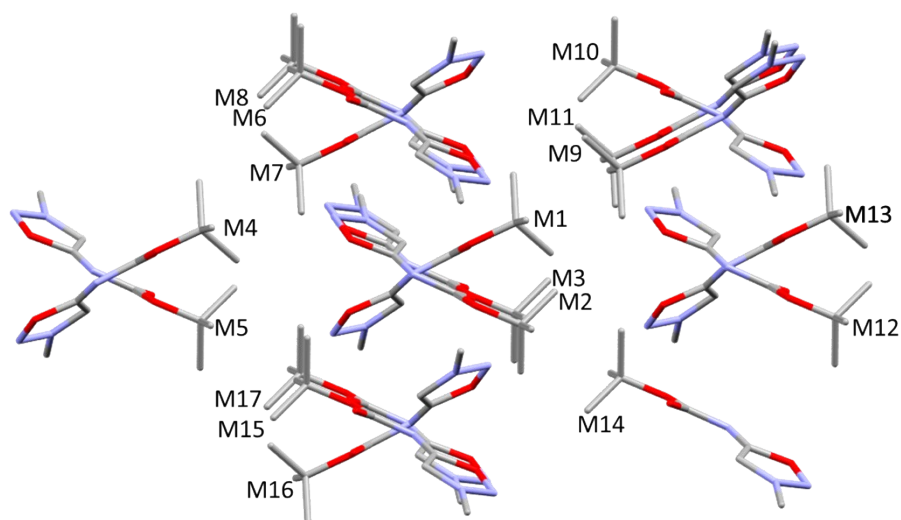

Figure S14 Supramolecular cluster of compound **12**

Table S13 Contact area and energetic data of each dimer from the supramolecular cluster of dimers of compound **12**

| Dimer           | Symmetry Code         | $C_{M1 \cdots MN}$<br>( $\text{\AA}^2$ ) | $G_{M1 \cdots MN}$<br>( $\text{kcal mol}^{-1}$ ) | $NC_{M1 \cdots MN}$ | $NG_{M1 \cdots MN}$ |
|-----------------|-----------------------|------------------------------------------|--------------------------------------------------|---------------------|---------------------|
| M1              | $x, y, z$             |                                          |                                                  |                     |                     |
| M1 $\cdots$ M2  | $x, 1/2-y, 1/2+z$     | 33.12                                    | -9.75                                            | 1.91                | 2.54                |
| M1 $\cdots$ M3  | $x, 1/2-y, -1/2+z$    | 33.12                                    | -9.75                                            | 1.91                | 2.54                |
| M1 $\cdots$ M4  | $-1+x, y, z$          | 3.4                                      | -0.17                                            | 0.20                | 0.05                |
| M1 $\cdots$ M5  | $-1+x, 1/2-y, -1/2+z$ | 14.71                                    | -1.31                                            | 0.85                | 0.34                |
| M1 $\cdots$ M6  | $1-x, 1/2+y, 1.5-z$   | 9.27                                     | -0.29                                            | 0.53                | 0.08                |
| M1 $\cdots$ M7  | $1-x, 1-y, 1-z$       | 28.24                                    | -3.56                                            | 1.62                | 0.93                |
| M1 $\cdots$ M8  | $1-x, 1/2+y, 1/2-z$   | 16.32                                    | -5.29                                            | 0.94                | 1.38                |
| M1 $\cdots$ M9  | $2-x, 1-y, 2-z$       | 1.39                                     | -0.23                                            | 0.08                | 0.06                |
| M1 $\cdots$ M10 | $2-x, 1/2+y, 1.5-z$   | 16                                       | -1.54                                            | 0.92                | 0.40                |
| M1 $\cdots$ M11 | $2-x, 1-y, 1-z$       | 16.99                                    | -2.35                                            | 0.98                | 0.61                |
| M1 $\cdots$ M12 | $1+x, 1/2-y, 1/2+z$   | 14.71                                    | -1.31                                            | 0.85                | 0.34                |
| M1 $\cdots$ M13 | $1+x, y, z$           | 3.4                                      | -0.17                                            | 0.20                | 0.05                |
| M1 $\cdots$ M14 | $2-x, -1/2+y, 1.5-z$  | 16                                       | -1.54                                            | 0.92                | 0.40                |
| M1 $\cdots$ M15 | $1-x, -1/2+y, 1.5-z$  | 9.27                                     | -0.29                                            | 0.53                | 0.08                |
| M1 $\cdots$ M16 | $1-x, -y, 1-z$        | 45.82                                    | -18.55                                           | 2.64                | 4.84                |
| M1 $\cdots$ M17 | $1-x, -1/2+y, 1/2-z$  | 16.32                                    | -5.29                                            | 0.94                | 1.38                |
| Total           |                       | 278.08                                   | -51.64                                           | 16.00               | 16.00               |

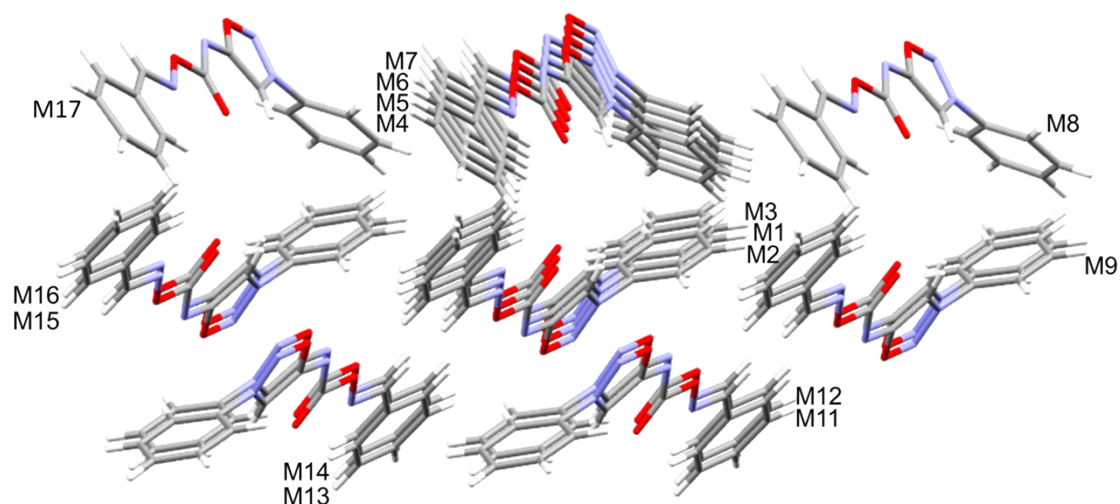

Figure S15 Supramolecular cluster of compound **13**

Table S14 Contact area and energetic data of each dimer from the supramolecular cluster of dimers of compound **13**

| Dimer           | Symmetry Code         | $C_{M1 \cdots MN}$<br>( $\text{\AA}^2$ ) | $G_{M1 \cdots MN}$<br>( $\text{kcal mol}^{-1}$ ) | $NC_{M1 \cdots MN}$ | $NG_{M1 \cdots MN}$ |
|-----------------|-----------------------|------------------------------------------|--------------------------------------------------|---------------------|---------------------|
| M1              | $x, y, z$             |                                          |                                                  |                     |                     |
| M1 $\cdots$ M2  | $x, y, 1+z$           | 47.54                                    | -12.21                                           | 1.91                | 2.14                |
| M1 $\cdots$ M3  | $x, y, -1+z$          | 47.54                                    | -12.21                                           | 1.91                | 2.14                |
| M1 $\cdots$ M4  | $x, 1/2-y, -1.5+z$    | 3.06                                     | -1.04                                            | 0.12                | 0.18                |
| M1 $\cdots$ M5  | $x, 1/2-y, -1/2+z$    | 43.61                                    | -6.98                                            | 1.75                | 1.22                |
| M1 $\cdots$ M6  | $x, 1/2-y, 1/2+z$     | 43.61                                    | -6.98                                            | 1.75                | 1.22                |
| M1 $\cdots$ M7  | $x, 1/2-y, 1.5+z$     | 3.06                                     | -1.04                                            | 0.12                | 0.18                |
| M1 $\cdots$ M8  | $1+x, 1/2-y, 1.5+z$   | 11.94                                    | -3.65                                            | 0.48                | 0.64                |
| M1 $\cdots$ M9  | $1+x, y, 1+z$         | 15.1                                     | -4.43                                            | 0.61                | 0.78                |
| M1 $\cdots$ M10 | $1+x, y, 2+z$         | 15.16                                    | -1.58                                            | 0.61                | 0.28                |
| M1 $\cdots$ M11 | $1-x, 1-y, 1-z$       | 46.84                                    | -15.82                                           | 1.88                | 2.77                |
| M1 $\cdots$ M12 | $1-x, 1-y, 2-z$       | 20.1                                     | -4.58                                            | 0.81                | 0.80                |
| M1 $\cdots$ M13 | $-x, 1-y, -1-z$       | 19.95                                    | -3.01                                            | 0.80                | 0.53                |
| M1 $\cdots$ M14 | $-x, 1-y, -z$         | 37.94                                    | -8.26                                            | 1.53                | 1.44                |
| M1 $\cdots$ M15 | $-1+x, y, -2+z$       | 15.16                                    | -1.58                                            | 0.61                | 0.28                |
| M1 $\cdots$ M16 | $-1+x, y, -1+z$       | 15.10                                    | -4.43                                            | 0.61                | 0.78                |
| M1 $\cdots$ M17 | $-1+x, 1/2-y, -1.5+z$ | 11.94                                    | -3.65                                            | 0.48                | 0.64                |
| Total           |                       | 370.61                                   | -83.37                                           | 16.00               | 16.00               |

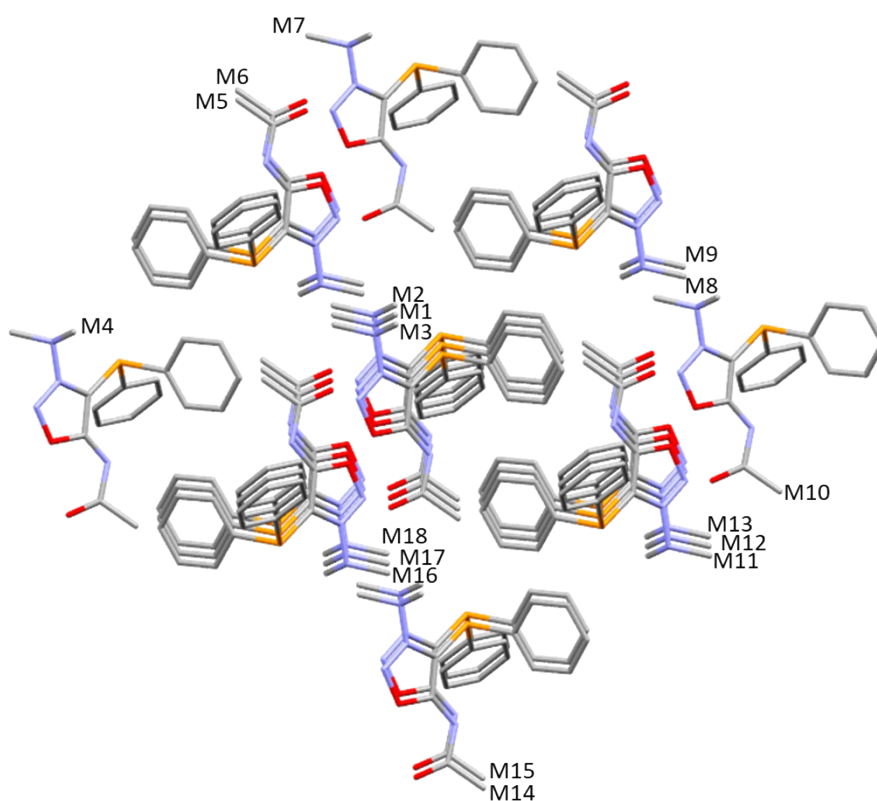

Figure S16 Supramolecular cluster of compound **14**

Table S15 Contact area and energetic data of each dimer from the supramolecular cluster of dimers of compound **14**

| Dimer           | Symmetry Code   | $C_{M1 \cdots MN}$<br>( $\text{\AA}^2$ ) | $G_{M1 \cdots MN}$<br>( $\text{kcal mol}^{-1}$ ) | $NC_{M1 \cdots MN}$ | $NG_{M1 \cdots MN}$ |
|-----------------|-----------------|------------------------------------------|--------------------------------------------------|---------------------|---------------------|
| M1              | $x, y, z$       |                                          |                                                  |                     |                     |
| M1 $\cdots$ M2  | $1+x, y, z$     | 46.97                                    | -9.61                                            | 1.76                | 1.79                |
| M1 $\cdots$ M3  | $-1+x, y, z$    | 46.97                                    | -9.61                                            | 1.76                | 1.79                |
| M1 $\cdots$ M4  | $x, y, 1+z$     | 11.27                                    | -1.38                                            | 0.42                | 0.26                |
| M1 $\cdots$ M5  | $2-x, 2-y, 2-z$ | 21.92                                    | -1.06                                            | 0.82                | 0.20                |
| M1 $\cdots$ M6  | $1-x, 2-y, 2-z$ | 27.08                                    | -7.51                                            | 1.02                | 1.40                |
| M1 $\cdots$ M7  | $x, 1+y, z$     | 23.9                                     | -5.73                                            | 0.90                | 1.07                |
| M1 $\cdots$ M8  | $2-x, 2-y, 1-z$ | 25.45                                    | -1.66                                            | 0.96                | 0.31                |
| M1 $\cdots$ M9  | $1-x, 2-y, 1-z$ | 33.33                                    | -6.29                                            | 1.25                | 1.17                |
| M1 $\cdots$ M10 | $x, y, -1+z$    | 11.27                                    | -1.38                                            | 0.42                | 0.26                |
| M1 $\cdots$ M11 | $2-x, 1-y, 1-z$ | 10.66                                    | -2.89                                            | 0.40                | 0.54                |
| M1 $\cdots$ M12 | $1-x, 1-y, 1-z$ | 93.95                                    | -14.99                                           | 3.53                | 2.80                |
| M1 $\cdots$ M13 | $-x, 1-y, 1-z$  | 5.74                                     | -1.41                                            | 0.22                | 0.26                |
| M1 $\cdots$ M14 | $x, -1+y, z$    | 23.9                                     | -5.73                                            | 0.90                | 1.07                |
| M1 $\cdots$ M15 | $-1+x, -1+y, z$ | 0.08                                     | -0.78                                            | 0.00                | 0.15                |
| M1 $\cdots$ M16 | $2-x, 1-y, 2-z$ | 0.15                                     | -2.83                                            | 0.01                | 0.53                |
| M1 $\cdots$ M17 | $1-x, 1-y, 2-z$ | 64.4                                     | -17.22                                           | 2.42                | 3.22                |
| M1 $\cdots$ M17 | $-x, 1-y, 2-z$  | 5.53                                     | -0.94                                            | 0.21                | 0.18                |
| Total           |                 | 452.57                                   | -81.41                                           | 17.00               | 17.00               |

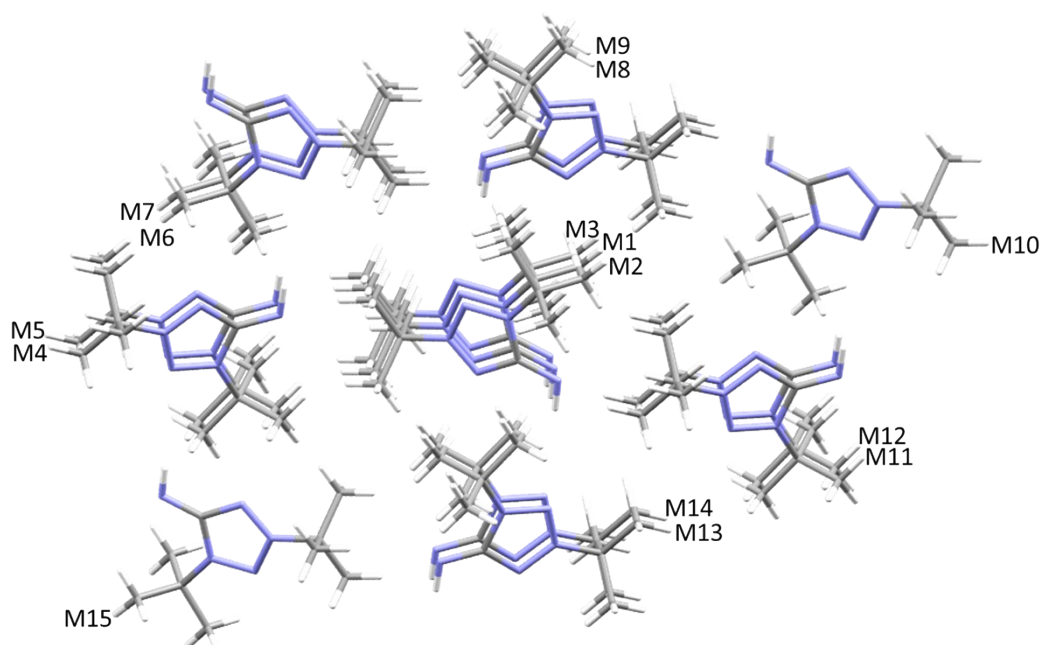

Figure S17 Supramolecular cluster of compound **15**

Table S16 Contact area and energetic data of each dimer from the supramolecular cluster of dimers of compound **15**

| Dimer           | Symmetry Code         | $C_{M1 \cdots MN}$<br>( $\text{\AA}^2$ ) | $G_{M1 \cdots MN}$<br>( $\text{kcal mol}^{-1}$ ) | $NC_{M1 \cdots MN}$ | $NG_{M1 \cdots MN}$ |
|-----------------|-----------------------|------------------------------------------|--------------------------------------------------|---------------------|---------------------|
| M1              | $x, y, z$             |                                          |                                                  |                     |                     |
| M1 $\cdots$ M2  | $1+x, y, z$           | 36.78                                    | -4.62                                            | 1.75                | 1.31                |
| M1 $\cdots$ M3  | $-1+x, y, z$          | 36.78                                    | -4.62                                            | 1.75                | 1.31                |
| M1 $\cdots$ M4  | $1-x, -1/2+y, 1/2-z$  | 16.44                                    | -2.79                                            | 0.78                | 0.79                |
| M1 $\cdots$ M5  | $-x, -1/2+y, 1/2-z$   | 17.66                                    | -4.94                                            | 0.84                | 1.40                |
| M1 $\cdots$ M6  | $1-x, -y, 1-z$        | 22.22                                    | -2.52                                            | 1.06                | 0.71                |
| M1 $\cdots$ M7  | $-x, -y, 1-z$         | 11.67                                    | -1.71                                            | 0.56                | 0.49                |
| M1 $\cdots$ M8  | $1+x, 1/2-y, 1/2+z$   | 23.36                                    | -3.74                                            | 1.11                | 1.06                |
| M1 $\cdots$ M9  | $x, 1/2-y, 1/2+z$     | 30.33                                    | -5.17                                            | 1.44                | 1.47                |
| M1 $\cdots$ M10 | $1-x, 1-y, 1-z$       | 3.46                                     | -0.94                                            | 0.16                | 0.27                |
| M1 $\cdots$ M11 | $1-x, 1/2+y, 1/2-z$   | 16.44                                    | -2.79                                            | 0.78                | 0.79                |
| M1 $\cdots$ M12 | $-x, 1/2+y, 1/2-z$    | 17.66                                    | -4.94                                            | 0.84                | 1.40                |
| M1 $\cdots$ M13 | $x, 1/2-y, -1/2+z$    | 30.33                                    | -5.17                                            | 1.44                | 1.47                |
| M1 $\cdots$ M14 | $-1+x, 1/2-y, -1/2+z$ | 23.36                                    | -3.74                                            | 1.11                | 1.06                |
| M1 $\cdots$ M15 | $-x, -y, -z$          | 7.72                                     | -1.67                                            | 0.37                | 0.47                |
| Total           |                       | 294.21                                   | -49.37                                           | 14.00               | 14.00               |

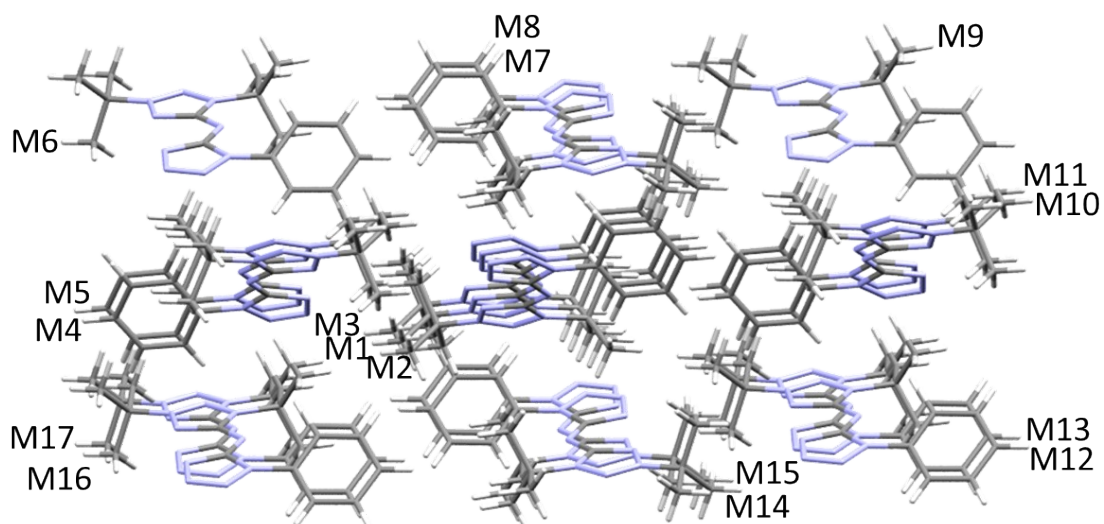

Figure S18 Supramolecular cluster of compound **16**

Table S17 Contact area and energetic data of each dimer from the supramolecular cluster of dimers of compound **16**

| Dimer           | Symmetry Code           | $C_{M1 \cdots MN}$<br>( $\text{\AA}^2$ ) | $G_{M1 \cdots MN}$<br>( $\text{kcal mol}^{-1}$ ) | $NC_{M1 \cdots MN}$ | $NG_{M1 \cdots MN}$ |
|-----------------|-------------------------|------------------------------------------|--------------------------------------------------|---------------------|---------------------|
| M1              | $x, y, z$               |                                          |                                                  |                     |                     |
| M1 $\cdots$ M2  | $1+x, y, z$             | 35.04                                    | -9.13                                            | 1.29                | 1.37                |
| M1 $\cdots$ M3  | $-1+x, y, z$            | 35.04                                    | -9.13                                            | 1.29                | 1.37                |
| M1 $\cdots$ M4  | $1-x, 1-y, 1-z$         | 38.10                                    | -17.97                                           | 1.40                | 2.70                |
| M1 $\cdots$ M5  | $-x, 1-y, 1-z$          | 17.38                                    | -17.97                                           | 0.64                | 2.70                |
| M1 $\cdots$ M6  | $-1/2+x, 1.5-y, 1/2+z$  | 7.32                                     | -0.61                                            | 0.27                | 0.09                |
| M1 $\cdots$ M7  | $1.5-x, 1/2+y, 1/2-z$   | 35.43                                    | -9.86                                            | 1.30                | 1.48                |
| M1 $\cdots$ M8  | $1/2-x, 1/2+y, 1/2-z$   | 70.45                                    | -12.40                                           | 2.59                | 1.86                |
| M1 $\cdots$ M9  | $1/2+x, 1.5-y, -1/2+z$  | 7.32                                     | -0.61                                            | 0.27                | 0.09                |
| M1 $\cdots$ M10 | $1-x, 1-y, -z$          | 32.18                                    | -3.79                                            | 1.18                | 0.57                |
| M1 $\cdots$ M11 | $-x, 1-y, -z$           | 0.01                                     | -0.04                                            | 0.00                | 0.01                |
| M1 $\cdots$ M12 | $1/2+x, 1/2-y, -1/2+z$  | 15.22                                    | -0.97                                            | 0.56                | 0.15                |
| M1 $\cdots$ M13 | $-1/2+x, 1/2-y, -1/2+z$ | 10.08                                    | -0.35                                            | 0.37                | 0.05                |
| M1 $\cdots$ M14 | $1.5-x, -1/2+y, 1/2-z$  | 35.43                                    | -9.86                                            | 1.30                | 1.48                |
| M1 $\cdots$ M15 | $1/2-x, -1/2+y, 1/2-z$  | 70.45                                    | -12.40                                           | 2.59                | 1.86                |
| M1 $\cdots$ M16 | $1/2+x, 1/2-y, 1/2+z$   | 10.08                                    | -0.35                                            | 0.37                | 0.05                |
| M1 $\cdots$ M17 | $-1/2+x, 1/2-y, 1/2+z$  | 15.22                                    | -0.97                                            | 0.56                | 0.15                |
| Total           |                         | 434.75                                   | -106.41                                          | 16.00               | 16.00               |



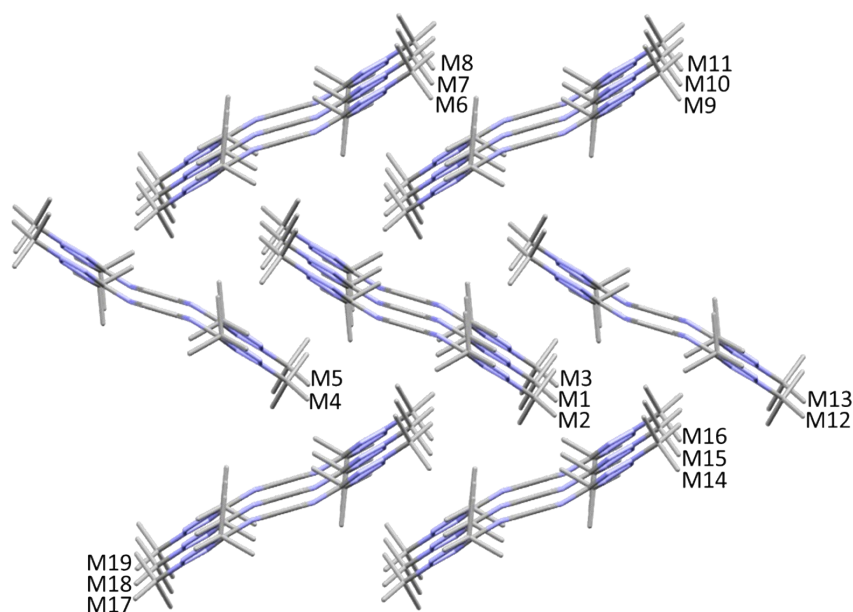

Figure S19 Supramolecular cluster of compound **17**

Table S18 Contact area and energetic data of each dimer from the supramolecular cluster of dimers of compound **17**

| Dimer           | Symmetry Code          | $C_{M1 \cdots MN}$<br>( $\text{\AA}^2$ ) | $G_{M1 \cdots MN}$<br>( $\text{kcal mol}^{-1}$ ) | $NC_{M1 \cdots MN}$ | $NG_{M1 \cdots MN}$ |
|-----------------|------------------------|------------------------------------------|--------------------------------------------------|---------------------|---------------------|
| M1              | $x, y, z$              |                                          |                                                  |                     |                     |
| M1 $\cdots$ M2  | $1+x, y, z$            | 76.33                                    | -12.25                                           | 2.24                | 2.30                |
| M1 $\cdots$ M3  | $-1+x, y, z$           | 76.33                                    | -12.25                                           | 2.24                | 2.30                |
| M1 $\cdots$ M4  | $x, -1+y, z$           | 44.24                                    | -9.38                                            | 1.30                | 1.76                |
| M1 $\cdots$ M5  | $-1+x, -1+y, z$        | 45.52                                    | -5.81                                            | 1.34                | 1.09                |
| M1 $\cdots$ M6  | $1-x, -1/2+y, 1/2-z$   | 3.40                                     | -0.65                                            | 0.10                | 0.12                |
| M1 $\cdots$ M7  | $-x, -1/2+y, 1/2-z$    | 53.42                                    | -7.95                                            | 1.57                | 1.49                |
| M1 $\cdots$ M8  | $-1-x, -1/2+y, 1/2-z$  | 13.24                                    | -1.69                                            | 0.39                | 0.32                |
| M1 $\cdots$ M9  | $1-x, 1/2+y, 1/2-z$    | 3.40                                     | -0.65                                            | 0.10                | 0.12                |
| M1 $\cdots$ M10 | $-x, 1/2+y, 1/2-z$     | 53.42                                    | -7.95                                            | 1.57                | 1.49                |
| M1 $\cdots$ M11 | $-1-x, 1/2+y, 1/2-z$   | 13.24                                    | -1.69                                            | 0.39                | 0.32                |
| M1 $\cdots$ M12 | $1+x, 1+y, z$          | 45.52                                    | -5.81                                            | 1.34                | 1.09                |
| M1 $\cdots$ M13 | $x, 1+y, z$            | 44.24                                    | -9.38                                            | 1.30                | 1.76                |
| M1 $\cdots$ M14 | $1-x, 1/2+y, -1/2-z$   | 13.24                                    | -1.69                                            | 0.39                | 0.32                |
| M1 $\cdots$ M15 | $-x, 1/2+y, -1/2-z$    | 53.42                                    | -7.95                                            | 1.57                | 1.49                |
| M1 $\cdots$ M16 | $-1-x, 1/2+y, -1/2-z$  | 3.40                                     | -0.65                                            | 0.10                | 0.12                |
| M1 $\cdots$ M17 | $1-x, -1/2+y, -1/2-z$  | 13.24                                    | -1.69                                            | 0.39                | 0.32                |
| M1 $\cdots$ M18 | $-x, -1/2+y, -1/2-z$   | 53.42                                    | -7.95                                            | 1.57                | 1.49                |
| M1 $\cdots$ M19 | $-1-x, -1/2+y, -1/2-z$ | 3.4                                      | -0.65                                            | 0.10                | 0.12                |
| Total           |                        | 612.42                                   | -95.99                                           | 18.00               | 18.00               |



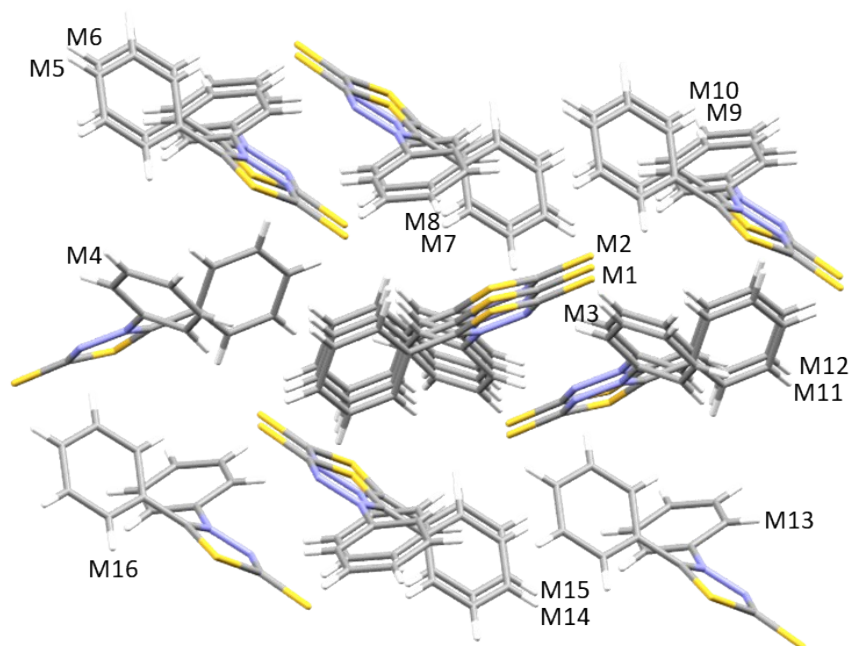

Figure S20 Supramolecular cluster of compound **18**

Table S19 Contact area and energetic data of each dimer from the supramolecular cluster of dimers of compound **18**

| Dimer           | Symmetry Code           | $C_{M1 \cdots MN}$<br>( $\text{\AA}^2$ ) | $G_{M1 \cdots MN}$<br>( $\text{kcal mol}^{-1}$ ) | $NC_{M1 \cdots MN}$ | $NG_{M1 \cdots MN}$ |
|-----------------|-------------------------|------------------------------------------|--------------------------------------------------|---------------------|---------------------|
| M1              | $x, y, z$               |                                          |                                                  |                     |                     |
| M1 $\cdots$ M2  | $1+x, y, z$             | 23.32                                    | -1,67                                            | 1.09                | 0.31                |
| M1 $\cdots$ M3  | $-1+x, y, z$            | 23.32                                    | -1,67                                            | 1.09                | 0.31                |
| M1 $\cdots$ M4  | $1-x, 1-y, 2-z$         | 45.59                                    | -3,61                                            | 2.12                | 0.66                |
| M1 $\cdots$ M5  | $1/2+x, 1.5-y, 1/2+z$   | 8.91                                     | -4,67                                            | 0.42                | 0.85                |
| M1 $\cdots$ M6  | $-1/2+x, 1.5-y, 1/2+z$  | 5.56                                     | -3,24                                            | 0.26                | 0.59                |
| M1 $\cdots$ M7  | $1.5-x, 1/2+y, 1.5-z$   | 11.74                                    | -5,25                                            | 0.55                | 0.96                |
| M1 $\cdots$ M8  | $1/2-x, 1/2+y, 1.5-z$   | 43.77                                    | -8,83                                            | 2.04                | 1.61                |
| M1 $\cdots$ M9  | $1/2+x, 1.5-y, -1/2+z$  | 5.56                                     | -3,24                                            | 0.26                | 0.59                |
| M1 $\cdots$ M10 | $-1/2+x, 1.5-y, -1/2+z$ | 8.91                                     | -4,67                                            | 0.42                | 0.85                |
| M1 $\cdots$ M11 | $1-x, 1-y, 1-z$         | 35.49                                    | -16,90                                           | 1.65                | 3.09                |
| M1 $\cdots$ M12 | $-x, 1-y, 1-z$          | 25.34                                    | -12,53                                           | 1.18                | 2.29                |
| M1 $\cdots$ M13 | $-1/2+x, 1/2-y, -1/2+z$ | 14.45                                    | -0,84                                            | 0.67                | 0.15                |
| M1 $\cdots$ M14 | $1.5-x, -1/2+y, 1.5-z$  | 11.74                                    | -5,25                                            | 0.55                | 0.96                |
| M1 $\cdots$ M15 | $1/2-x, -1/2+y, 1.5-z$  | 43.77                                    | -8,83                                            | 2.04                | 1.61                |
| M1 $\cdots$ M16 | $1/2+x, 1/2-y, 1/2+z$   | 14.45                                    | -0,84                                            | 0.67                | 0.15                |
| Total           |                         | 321.92                                   | -82.02                                           | 15.00               | 15.00               |

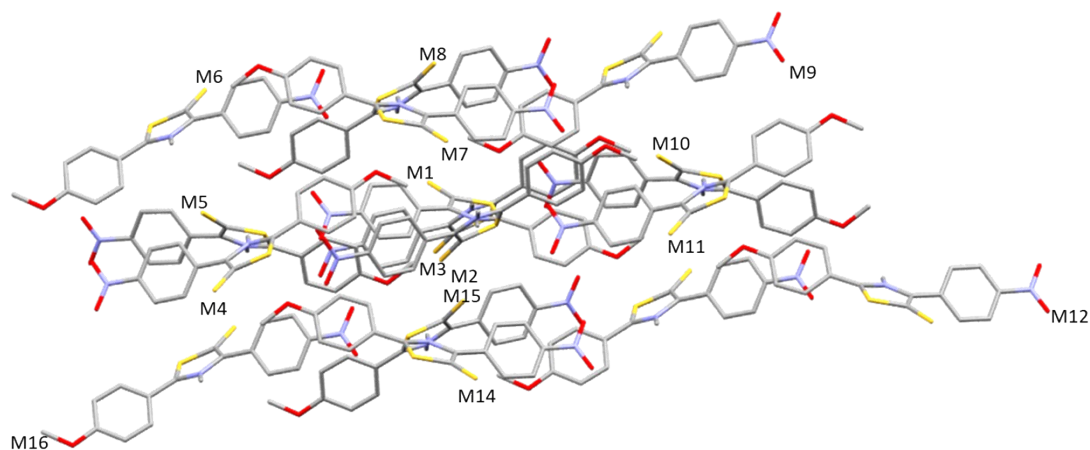

Figure S21 Supramolecular cluster of compound **19**

Table S20 Contact area and energetic data of each dimer from the supramolecular cluster of dimers of compound **19**

| Dimer           | Symmetry Code        | $C_{M1 \cdots MN}$<br>( $\text{\AA}^2$ ) | $G_{M1 \cdots MN}$<br>( $\text{kcal mol}^{-1}$ ) | $NC_{M1 \cdots MN}$ | $NG_{M1 \cdots MN}$ |
|-----------------|----------------------|------------------------------------------|--------------------------------------------------|---------------------|---------------------|
| M1              | $x, y, z$            |                                          |                                                  |                     |                     |
| M1 $\cdots$ M2  | $1.5-x, 1/2+y, z$    | 12.61                                    | -5.32                                            | 0.46                | 0.78                |
| M1 $\cdots$ M3  | $1.5-x, -1/2+y, z$   | 12.61                                    | -5.32                                            | 0.46                | 0.78                |
| M1 $\cdots$ M4  | $1.5-x, 1-y, -1/2+z$ | 38.01                                    | -7.88                                            | 1.39                | 1.15                |
| M1 $\cdots$ M5  | $x, 1/2-y, -1/2+z$   | 41.88                                    | -8.50                                            | 1.54                | 1.24                |
| M1 $\cdots$ M6  | $1/2+x, y, 1/2-z$    | 12.84                                    | -2.34                                            | 0.47                | 0.34                |
| M1 $\cdots$ M7  | $2-x, 1-y, 1-z$      | 4.95                                     | -4.22                                            | 0.18                | 0.62                |
| M1 $\cdots$ M8  | $1/2+x, 1/2-y, 1-z$  | 36.07                                    | -16.33                                           | 1.32                | 2.38                |
| M1 $\cdots$ M9  | $1/2+x, y, 1.5-z$    | 42.87                                    | -7.26                                            | 1.57                | 1.06                |
| M1 $\cdots$ M10 | $1.5-x, 1-y, 1/2+z$  | 38.01                                    | -7.88                                            | 1.39                | 1.15                |
| M1 $\cdots$ M11 | $x, 1/2-y, 1/2+z$    | 41.88                                    | -8.50                                            | 1.54                | 1.24                |
| M1 $\cdots$ M12 | $1-x, 1-y, 2-z$      | 3.59                                     | 0.60                                             | 0.13                | -0.09               |
| M1 $\cdots$ M13 | $-1/2+x, y, 1.5-z$   | 42.87                                    | -7.26                                            | 1.57                | 1.06                |
| M1 $\cdots$ M14 | $1-x, 1-y, 1-z$      | 31.98                                    | -3.87                                            | 1.17                | 0.56                |
| M1 $\cdots$ M15 | $-1/2+x, 1/2-y, 1-z$ | 36.07                                    | -16.33                                           | 1.32                | 2.38                |
| M1 $\cdots$ M16 | $-1/2+x, 1/2-y, 1-z$ | 12.84                                    | -2.34                                            | 0.47                | 0.34                |
| Total           |                      | 409.08                                   | -97.42                                           | 15.00               | 15.00               |

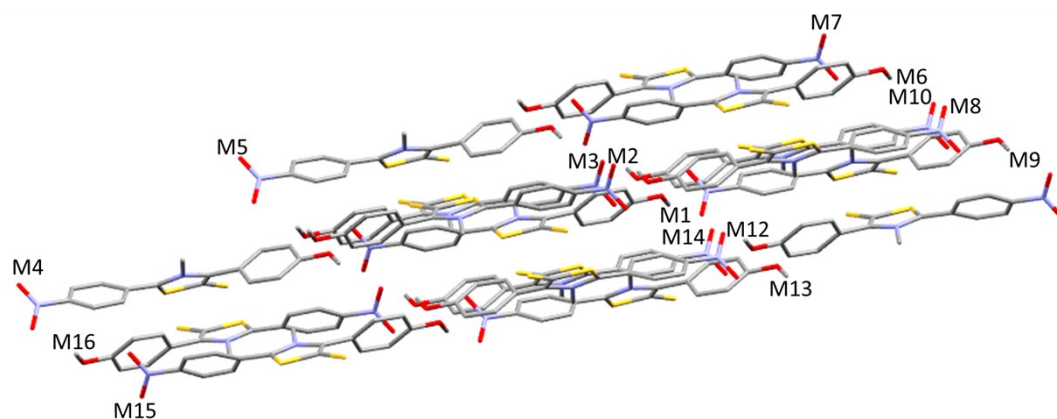

Figure S22 Supramolecular cluster of compound **20**

Table S21 Contact area and energetic data of each dimer from the supramolecular cluster of dimers of compound **20**

| Dimer           | Symmetry Code           | $C_{M1 \cdots MN}$<br>( $\text{\AA}^2$ ) | $G_{M1 \cdots MN}$<br>( $\text{kcal mol}^{-1}$ ) | $NC_{M1 \cdots MN}$ | $NG_{M1 \cdots MN}$ |
|-----------------|-------------------------|------------------------------------------|--------------------------------------------------|---------------------|---------------------|
| M1              | $x, y, z$               |                                          |                                                  |                     |                     |
| M1 $\cdots$ M2  | $1-x, 1-y, 1-z$         | 16.79                                    | -12.39                                           | 0.64                | 1.78                |
| M1 $\cdots$ M3  | $1-x, -y, 1-z$          | 54.3                                     | -5.56                                            | 2.07                | 0.80                |
| M1 $\cdots$ M4  | $1.5+x, 1/2-y, 1/2+z$   | 15.55                                    | -1.02                                            | 0.59                | 0.15                |
| M1 $\cdots$ M5  | $1/2+x, 1/2-y, 1/2+z$   | 70.78                                    | -23.72                                           | 2.70                | 3.41                |
| M1 $\cdots$ M6  | $-1+x, y, z$            | 30.86                                    | -5.27                                            | 1.18                | 0.76                |
| M1 $\cdots$ M7  | $-x, -y, 1-z$           | 4.05                                     | -0.63                                            | 0.15                | 0.09                |
| M1 $\cdots$ M8  | $-1/2-x, 1/2+y, 1/2-z$  | 11.94                                    | -2.09                                            | 0.46                | 0.30                |
| M1 $\cdots$ M9  | $-1.5+x, 1/2-y, -1/2+z$ | 15.55                                    | -1.02                                            | 0.59                | 0.15                |
| M1 $\cdots$ M10 | $-1/2-x, -1/2+y, 1/2-z$ | 11.94                                    | -2.09                                            | 0.46                | 0.30                |
| M1 $\cdots$ M11 | $-1-x, -y, -z$          | 7.84                                     | -0.56                                            | 0.30                | 0.08                |
| M1 $\cdots$ M12 | $1/2-x, 1/2+y, 1/2-z$   | 20.44                                    | -9.55                                            | 0.78                | 1.37                |
| M1 $\cdots$ M13 | $-1/2+x, 1/2-y, -1/2+z$ | 70.78                                    | -23.72                                           | 2.70                | 3.41                |
| M1 $\cdots$ M14 | $1/2-x, -1/2+y, 1/2-z$  | 20.44                                    | -9.55                                            | 0.78                | 1.37                |
| M1 $\cdots$ M15 | $1+x, y, z$             | 30.86                                    | -5.27                                            | 1.18                | 0.76                |
| M1 $\cdots$ M16 | $2-x, -y, 1-z$          | 10.98                                    | -2.03                                            | 0.42                | 0.29                |
| Total           |                         | 393.10                                   | -92.09                                           | 15.00               | 15.00               |

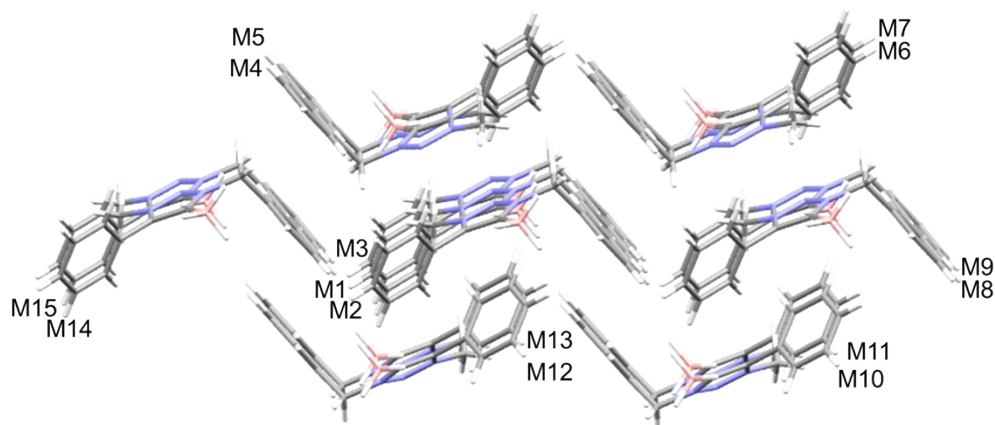

Figure S23 Supramolecular cluster of compound **21**

Table S22 Contact area and energetic data of each dimer from the supramolecular cluster of dimers of compound **21**

| Dimer           | Symmetry Code        | $C_{M1 \cdots MN}$<br>( $\text{\AA}^2$ ) | $G_{M1 \cdots MN}$<br>( $\text{kcal mol}^{-1}$ ) | $NC_{M1 \cdots MN}$ | $NG_{M1 \cdots MN}$ |
|-----------------|----------------------|------------------------------------------|--------------------------------------------------|---------------------|---------------------|
| M1              | $x, y, z$            |                                          |                                                  |                     |                     |
| M1 $\cdots$ M2  | $x, 1+y, z$          | 29.59                                    | -4.25                                            | 1.10                | 0.73                |
| M1 $\cdots$ M3  | $x, -1+y, z$         | 29.59                                    | -4.25                                            | 1.10                | 0.73                |
| M1 $\cdots$ M4  | $x, -1+y, z$         | 15.25                                    | -5.18                                            | 0.56                | 0.88                |
| M1 $\cdots$ M5  | $1-x, -y, -z$        | 64.95                                    | -17.70                                           | 2.40                | 3.02                |
| M1 $\cdots$ M6  | $2-x, -y, -z$        | 35.99                                    | -8.37                                            | 1.33                | 1.43                |
| M1 $\cdots$ M7  | $2-x, -1-y, -z$      | 6.20                                     | -1.18                                            | 0.23                | 0.20                |
| M1 $\cdots$ M8  | $1+x, y, z$          | 17.07                                    | -3.06                                            | 0.63                | 0.52                |
| M1 $\cdots$ M9  | $1+x, -1+y, z$       | 15.86                                    | -1.30                                            | 0.59                | 0.22                |
| M1 $\cdots$ M10 | $2-x, 1/2+y, 1/2-z$  | 16.26                                    | -3.16                                            | 0.60                | 0.54                |
| M1 $\cdots$ M11 | $2-x, -1/2+y, 1/2-z$ | 16.26                                    | -3.16                                            | 0.60                | 0.54                |
| M1 $\cdots$ M12 | $1-x, 1/2+y, 1/2-z$  | 49.12                                    | -13.03                                           | 1.82                | 2.22                |
| M1 $\cdots$ M13 | $1-x, -1/2+y, 1/2-z$ | 49.12                                    | -13.03                                           | 1.82                | 2.22                |
| M1 $\cdots$ M14 | $-1+x, 1+y, z$       | 15.86                                    | -1.30                                            | 0.59                | 0.22                |
| M1 $\cdots$ M15 | $-1+x, y, z$         | 17.07                                    | -3.06                                            | 0.63                | 0.52                |
| M1 $\cdots$ M16 | $x, 1+y, z$          | 29.59                                    | -4.25                                            | 1.10                | 0.73                |
| Total           |                      | 378.19                                   | -82.03                                           | 14.00               | 14.00               |

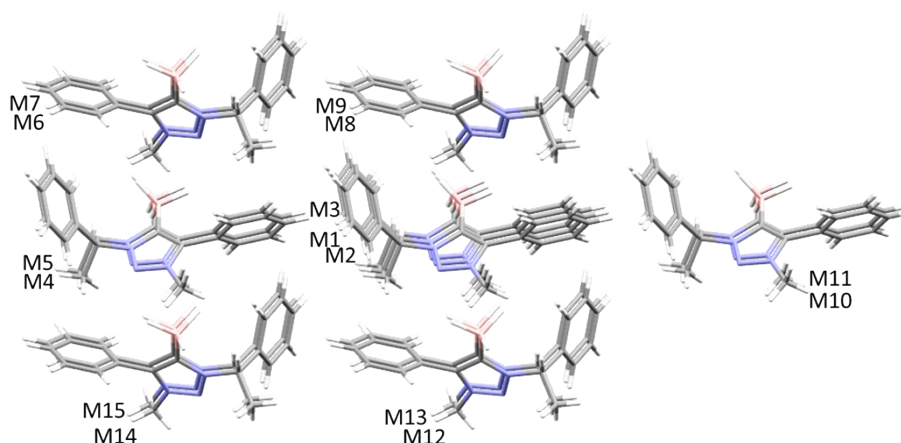

Figure S24 Supramolecular cluster of compound **22**

Table S23 Contact area and energetic data of each dimer from the supramolecular cluster of dimers of compound **22**

| Dimer           | Symmetry Code      | $C_{M1 \cdots MN}$<br>( $\text{\AA}^2$ ) | $G_{M1 \cdots MN}$<br>( $\text{kcal mol}^{-1}$ ) | $NC_{M1 \cdots MN}$ | $NG_{M1 \cdots MN}$ |
|-----------------|--------------------|------------------------------------------|--------------------------------------------------|---------------------|---------------------|
| M1              | $x, y, z$          |                                          |                                                  |                     |                     |
| M1 $\cdots$ M2  | $1+x, y, z$        | 59.09                                    | -9.92                                            | 2.06                | 1.74                |
| M1 $\cdots$ M3  | $-1+x, y, z$       | 59.09                                    | -9.92                                            | 2.06                | 1.74                |
| M1 $\cdots$ M4  | $1+x, y, 1+z$      | 10.86                                    | -1.05                                            | 0.38                | 0.18                |
| M1 $\cdots$ M5  | $x, y, 1+z$        | 17.24                                    | -3.37                                            | 0.60                | 0.59                |
| M1 $\cdots$ M6  | $1-x, 1/2+y, 2-z$  | 12.42                                    | -1.87                                            | 0.43                | 0.33                |
| M1 $\cdots$ M7  | $-x, 1/2+y, 2-z$   | 0.49                                     | -0.52                                            | 0.02                | 0.09                |
| M1 $\cdots$ M8  | $1-x, 1/2+y, 1-z$  | 51.73                                    | -12.03                                           | 1.80                | 2.11                |
| M1 $\cdots$ M9  | $-x, 1/2+y, 1-z$   | 49.11                                    | -11.14                                           | 1.71                | 1.96                |
| M1 $\cdots$ M10 | $x, y, -1+z$       | 17.24                                    | -3.37                                            | 0.60                | 0.59                |
| M1 $\cdots$ M11 | $-1+x, y, -1+z$    | 10.86                                    | -1.05                                            | 0.38                | 0.18                |
| M1 $\cdots$ M12 | $1-x, -1/2+y, 1-z$ | 51.73                                    | -12.03                                           | 1.80                | 2.11                |
| M1 $\cdots$ M13 | $-x, -1/2+y, 1-z$  | 49.11                                    | -11.14                                           | 1.71                | 1.96                |
| M1 $\cdots$ M14 | $1-x, -1/2+y, 2-z$ | 12.42                                    | -1.87                                            | 0.43                | 0.33                |
| M1 $\cdots$ M15 | $-x, -1/2+y, 2-z$  | 0.49                                     | -0.52                                            | 0.02                | 0.09                |
| Total           |                    | 401.88                                   | -69.88                                           | 14.00               | 14.00               |

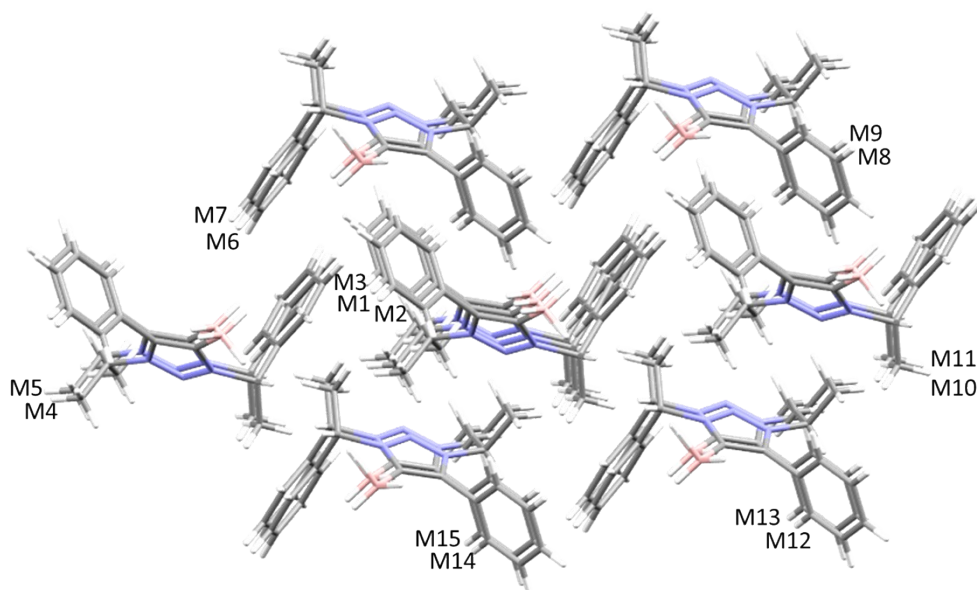

Figure S25 Supramolecular cluster of compound **23**

Table S24 Contact area and energetic data of each dimer from the supramolecular cluster of dimers of compound **23**

| Dimer           | Symmetry Code      | $C_{M1 \cdots MN}$<br>( $\text{\AA}^2$ ) | $G_{M1 \cdots MN}$<br>( $\text{kcal mol}^{-1}$ ) | $NC_{M1 \cdots MN}$ | $NG_{M1 \cdots MN}$ |
|-----------------|--------------------|------------------------------------------|--------------------------------------------------|---------------------|---------------------|
| M1              | $x, y, z$          |                                          |                                                  |                     |                     |
| M1 $\cdots$ M2  | $x, 1+y, z$        | 24.73                                    | -4.81                                            | 0.80                | 0.83                |
| M1 $\cdots$ M3  | $x, -1+y, z$       | 24.73                                    | -4.81                                            | 0.80                | 0.83                |
| M1 $\cdots$ M4  | $1+x, 1+y, z$      | 13.68                                    | -1.31                                            | 0.44                | 0.22                |
| M1 $\cdots$ M5  | $1+x, y, z$        | 32.81                                    | -6.13                                            | 1.06                | 1.05                |
| M1 $\cdots$ M6  | $1-x, 1/2+y, 1-z$  | 50.7                                     | -12.59                                           | 1.65                | 2.16                |
| M1 $\cdots$ M7  | $1-x, -1/2+y, 1-z$ | 50.7                                     | -12.59                                           | 1.65                | 2.16                |
| M1 $\cdots$ M8  | $-x, 1/2+y, 1-z$   | 19.11                                    | -3.66                                            | 0.62                | 0.63                |
| M1 $\cdots$ M9  | $-x, -1/2+y, 1-z$  | 19.11                                    | -3.66                                            | 0.62                | 0.63                |
| M1 $\cdots$ M10 | $-1+x, y, z$       | 32.81                                    | -6.13                                            | 1.06                | 1.05                |
| M1 $\cdots$ M11 | $-1+x, -1+y, z$    | 13.68                                    | -1.31                                            | 0.44                | 0.22                |
| M1 $\cdots$ M12 | $-x, 1/2+y, -z$    | 23.21                                    | -4.25                                            | 0.75                | 0.73                |
| M1 $\cdots$ M13 | $-x, -1/2+y, -z$   | 23.21                                    | -4.25                                            | 0.75                | 0.73                |
| M1 $\cdots$ M14 | $1-x, 1/2+y, -z$   | 51.42                                    | -8.06                                            | 1.67                | 1.38                |
| M1 $\cdots$ M15 | $1-x, -1/2+y, -z$  | 51.42                                    | -8.06                                            | 1.67                | 1.38                |
| Total           |                    | 431.32                                   | -76.82                                           | 14.00               | 14.00               |

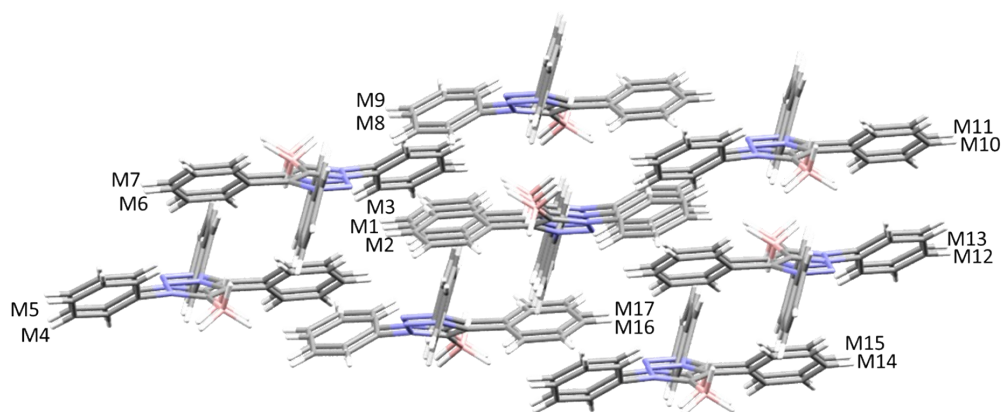

Figure S26 Supramolecular cluster of compound **24**

Table S25 Contact area and energetic data of each dimer from the supramolecular cluster of dimers of compound **24**

| Dimer           | Symmetry Code            | $C_{M1 \cdots MN}$<br>( $\text{\AA}^2$ ) | $G_{M1 \cdots MN}$<br>( $\text{kcal mol}^{-1}$ ) | $NC_{M1 \cdots MN}$ | $NG_{M1 \cdots MN}$ |
|-----------------|--------------------------|------------------------------------------|--------------------------------------------------|---------------------|---------------------|
| M1              | $x, y, z$                |                                          |                                                  |                     |                     |
| M1 $\cdots$ M2  | $x, 1+y, z$              | 18.91                                    | -4.91                                            | 0.71                | 0.86                |
| M1 $\cdots$ M3  | $x, -1+y, z$             | 18.91                                    | -4.91                                            | 0.71                | 0.86                |
| M1 $\cdots$ M4  | $-1/2-x, 1/2+y, -1/2-z$  | 2.77                                     | -0.06                                            | 0.10                | 0.01                |
| M1 $\cdots$ M5  | $-1/2-x, -1/2+y, -1/2-z$ | 2.77                                     | -0.06                                            | 0.10                | 0.01                |
| M1 $\cdots$ M6  | $-1/2+x, 1.5-y, -1/2+z$  | 14.53                                    | -3.71                                            | 0.55                | 0.65                |
| M1 $\cdots$ M7  | $-1/2+x, 1/2-y, -1/2+z$  | 29.97                                    | -5.51                                            | 1.13                | 0.96                |
| M1 $\cdots$ M8  | $1-x, 1-y, -z$           | 77.12                                    | -27.95                                           | 2.90                | 4.88                |
| M1 $\cdots$ M9  | $1-x, -y, -z$            | 15.47                                    | -1.41                                            | 0.58                | 0.25                |
| M1 $\cdots$ M10 | $1.5-x, 1/2+y, 1/2-z$    | 25.72                                    | -2.59                                            | 0.97                | 0.45                |
| M1 $\cdots$ M11 | $1.5-x, -1/2+y, 1/2-z$   | 25.72                                    | -2.59                                            | 0.97                | 0.45                |
| M1 $\cdots$ M12 | $1/2+x, 1.5-y, 1/2+z$    | 14.53                                    | -3.71                                            | 0.55                | 0.65                |
| M1 $\cdots$ M13 | $1/2+x, 1/2-y, 1/2+z$    | 29.97                                    | -5.51                                            | 1.13                | 0.96                |
| M1 $\cdots$ M14 | $1/2-x, 1/2+y, 1/2-z$    | 15.01                                    | -2.95                                            | 0.56                | 0.52                |
| M1 $\cdots$ M15 | $1/2-x, -1/2+y, 1/2-z$   | 15.01                                    | -2.95                                            | 0.56                | 0.52                |
| M1 $\cdots$ M16 | $-x, 1-y, -z$            | 72.77                                    | -16.63                                           | 2.73                | 2.91                |
| M1 $\cdots$ M17 | $-x, -y, -z$             | 46.59                                    | -6.10                                            | 1.75                | 1.07                |
| Total           |                          | 425.77                                   | -86.64                                           | 16.00               | 16.00               |

#### 4. Normalized Data

Table S26 Contact area (NC) and energetic (NG) data normalized of all 24 compounds.

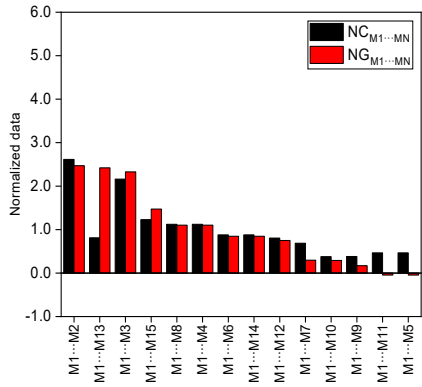

**1**

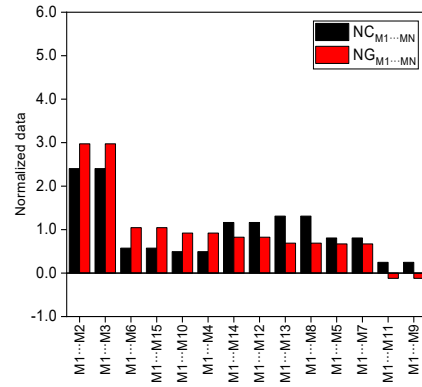

**2**

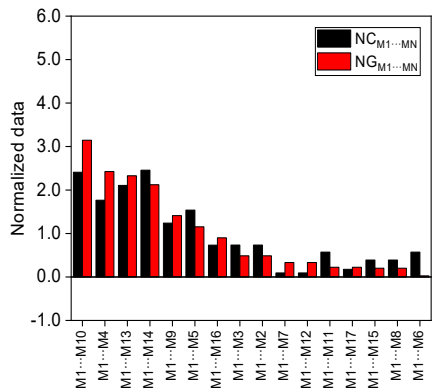

**3**

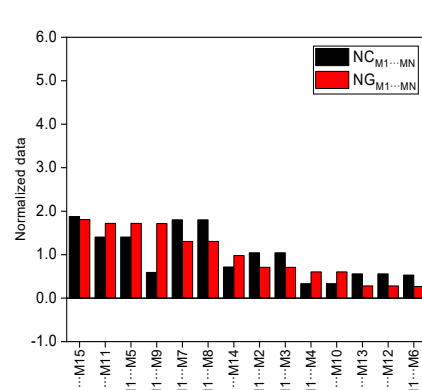

**4**

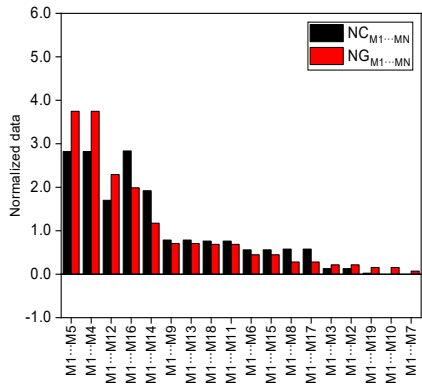

**5**

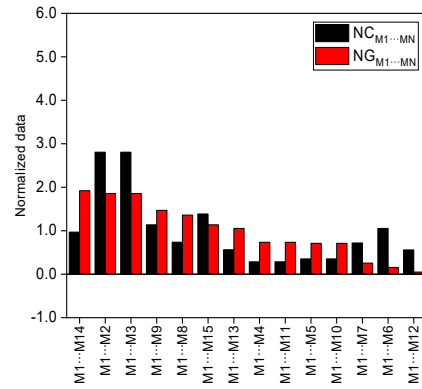

**6**



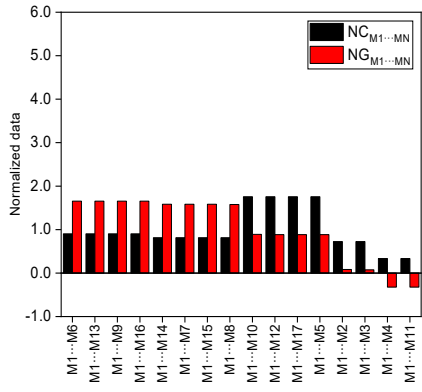

7

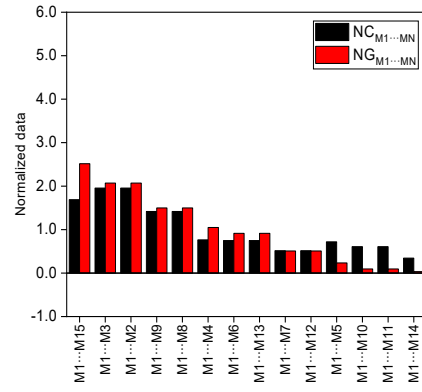

8

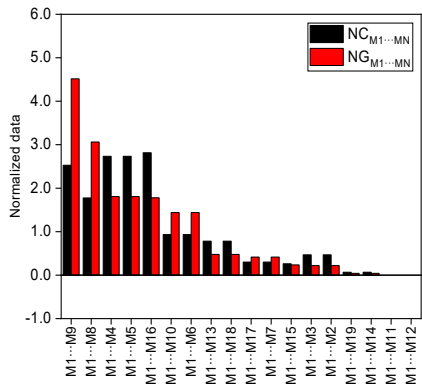

9

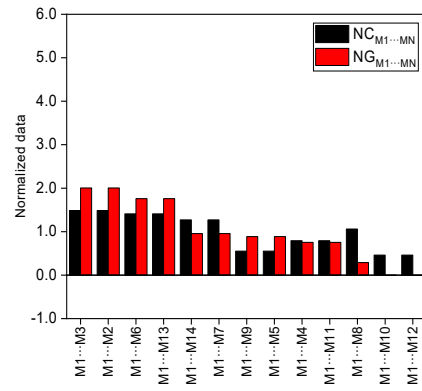

10

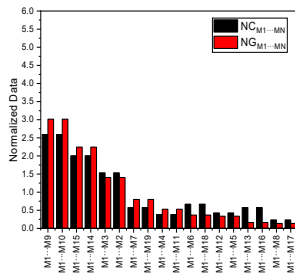

11

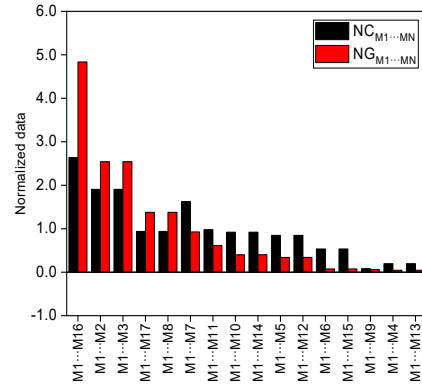

12

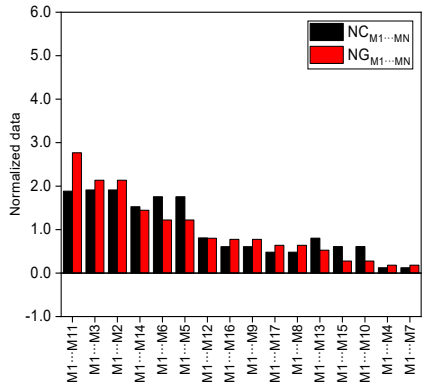

13

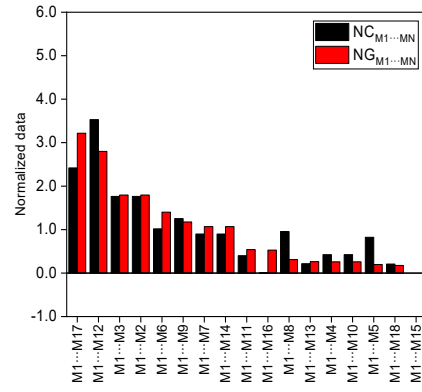

14

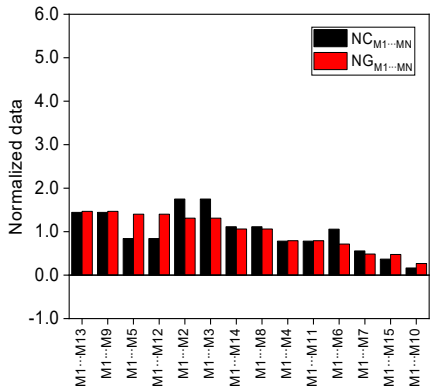

15

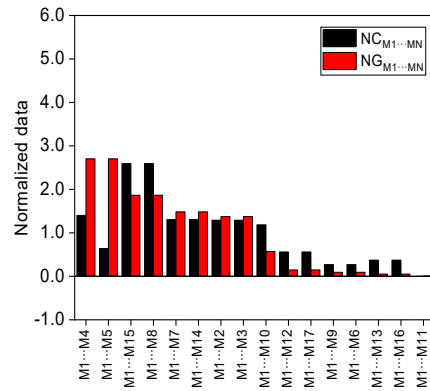

16

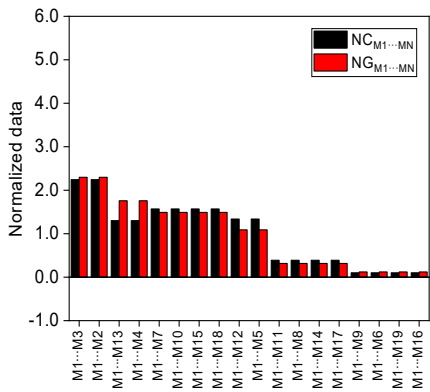

17

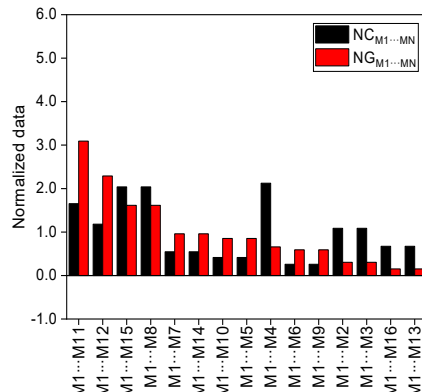

18

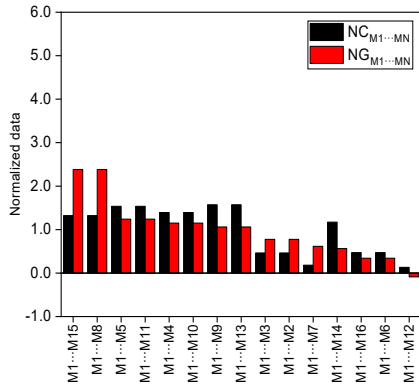

19

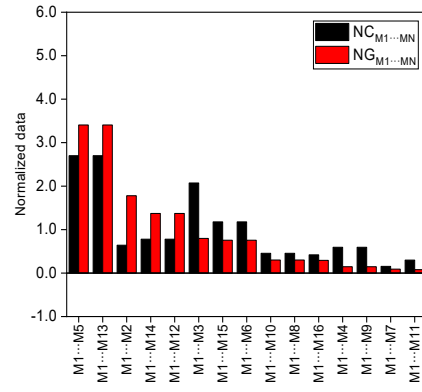

20

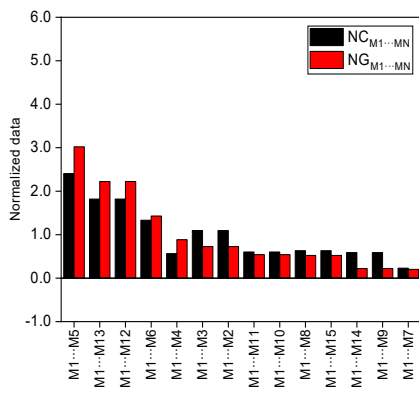

21

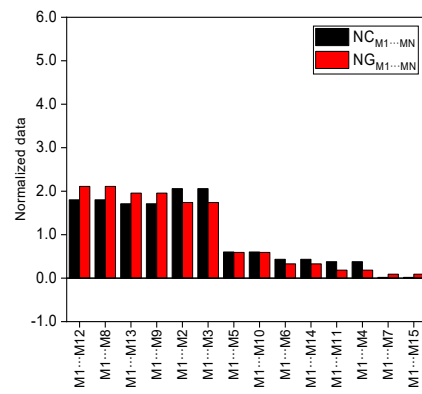

22

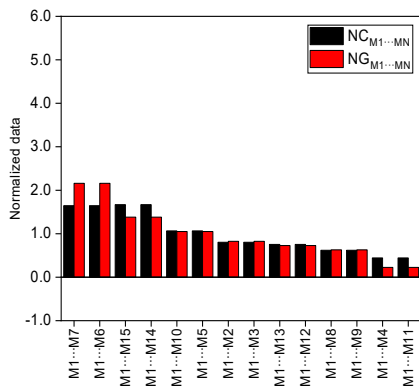

23

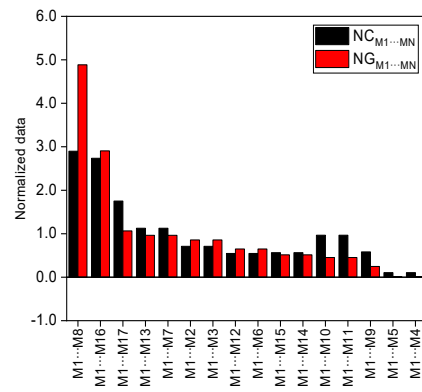

24

## 5. Supramolecular cluster data, CEE and CPE data

Table S27 Supramolecular cluster data, CEE and CPE data for structures **1-24**

| Cpd       | N  | $C_{\text{cluster}}^{\text{a}}$ | $G_{\text{cluster}}^{\text{b}}$ | $SG_{M1 \cdots MN} < 0$ | $SG_{M1 \cdots MN} < 0$ | CEE <sup>c</sup> | CPE <sup>d</sup> |
|-----------|----|---------------------------------|---------------------------------|-------------------------|-------------------------|------------------|------------------|
| <b>1</b>  | 14 | 272.60                          | -62.79                          | -63.20                  | 0.41                    | 0.994            | 0.899            |
| <b>2</b>  | 14 | 235.52                          | -64.95                          | -66.08                  | 1.13                    | 0.983            | 0.948            |
| <b>3</b>  | 16 | 292.15                          | -58.83                          | -58.83                  | 0.00                    | 1.000            | 0.876            |
| <b>4</b>  | 14 | 291.73                          | -67.34                          | -67.34                  | 0.00                    | 1.000            | 0.919            |
| <b>5</b>  | 18 | 273.96                          | -74.75                          | -74.75                  | 0.00                    | 1.000            | 0.902            |
| <b>6</b>  | 14 | 287.88                          | -81.64                          | -81.64                  | 0.00                    | 1.000            | 0.943            |
| <b>7</b>  | 16 | 227.12                          | -61.18                          | -63.65                  | 2.47                    | 0.961            | 0.912            |
| <b>8</b>  | 14 | 282.17                          | -55.62                          | -55.62                  | 0.00                    | 1.000            | 0.890            |
| <b>9</b>  | 18 | 330.14                          | -76.05                          | -77.71                  | 1.66                    | 0.979            | 0.909            |
| <b>10</b> | 13 | 217.39                          | -59.16                          | -59.21                  | 0.05                    | 0.999            | 0.924            |
| <b>11</b> | 18 | 397.52                          | -77.97                          | -77.97                  | 0.00                    | 1.000            | 0.876            |
| <b>12</b> | 16 | 278.08                          | -61.39                          | -61.39                  | 0.00                    | 1.000            | 0.876            |
| <b>13</b> | 16 | 397.65                          | -91.46                          | -91.46                  | 0.00                    | 1.000            | 0.886            |
| <b>14</b> | 17 | 452.57                          | -91.03                          | -91.03                  | 0.00                    | 1.000            | 0.880            |
| <b>15</b> | 14 | 294.21                          | -49.37                          | -49.37                  | 0.00                    | 1.000            | 0.896            |
| <b>16</b> | 16 | 434.75                          | -106.41                         | -106.41                 | 0.00                    | 1.000            | 0.898            |
| <b>17</b> | 18 | 612.42                          | -95.99                          | -95.99                  | 0.00                    | 1.000            | 0.838            |
| <b>18</b> | 15 | 321.92                          | -82.02                          | -82.02                  | 0.00                    | 1.000            | 0.876            |
| <b>19</b> | 15 | 409.08                          | -102.74                         | -103.34                 | 0.60                    | 0.994            | 0.905            |
| <b>20</b> | 15 | 393.10                          | -104.47                         | -104.47                 | 0.00                    | 1.000            | 0.935            |
| <b>21</b> | 14 | 378.19                          | -82.03                          | -82.03                  | 0.00                    | 1.000            | 0.885            |
| <b>22</b> | 14 | 401.88                          | -79.80                          | -79.80                  | 0.00                    | 1.000            | 0.892            |
| <b>23</b> | 14 | 431.32                          | -81.63                          | -81.63                  | 0.00                    | 1.000            | 0.882            |
| <b>24</b> | 16 | 425.77                          | -91.55                          | -91.55                  | 0.00                    | 1.000            | 0.896            |

<sup>a</sup>In Å<sup>2</sup>. <sup>b</sup>In kcal mol<sup>-1</sup>. <sup>c</sup>Calculated with eq 1. <sup>d</sup>CPE =  $(V_c - V_v)/V_c$ ; where CPE is the crystal packing efficiency;  $V_v$ , void volume (obtained using the CrystalExplorer software, with isovalue of 0.002e au<sup>-3</sup>); and  $V_c$ , cell volume.

## 6. Crystallization Mechanisms

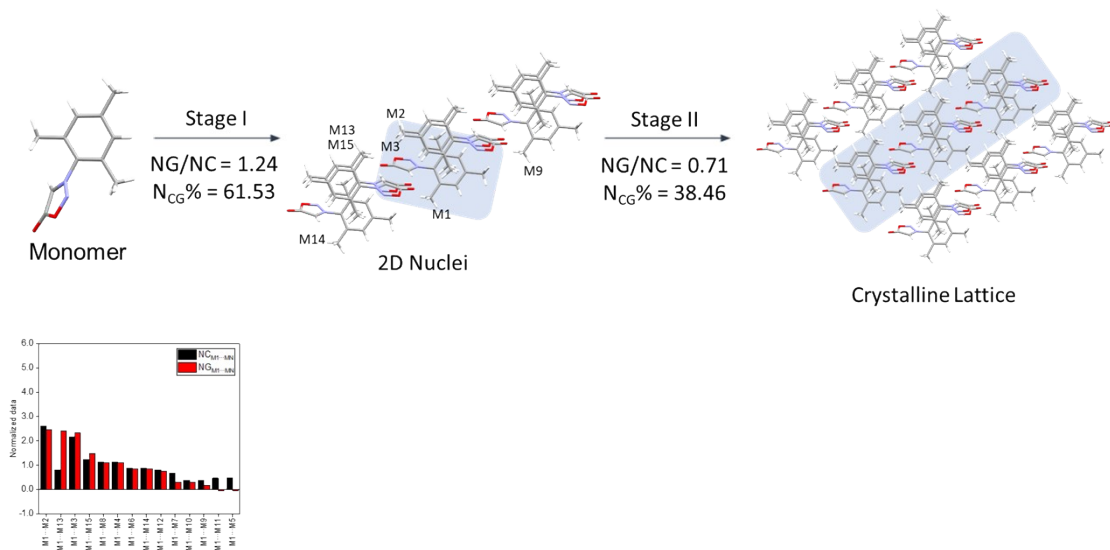

Figure S27 Crystallization mechanism of compound **1**

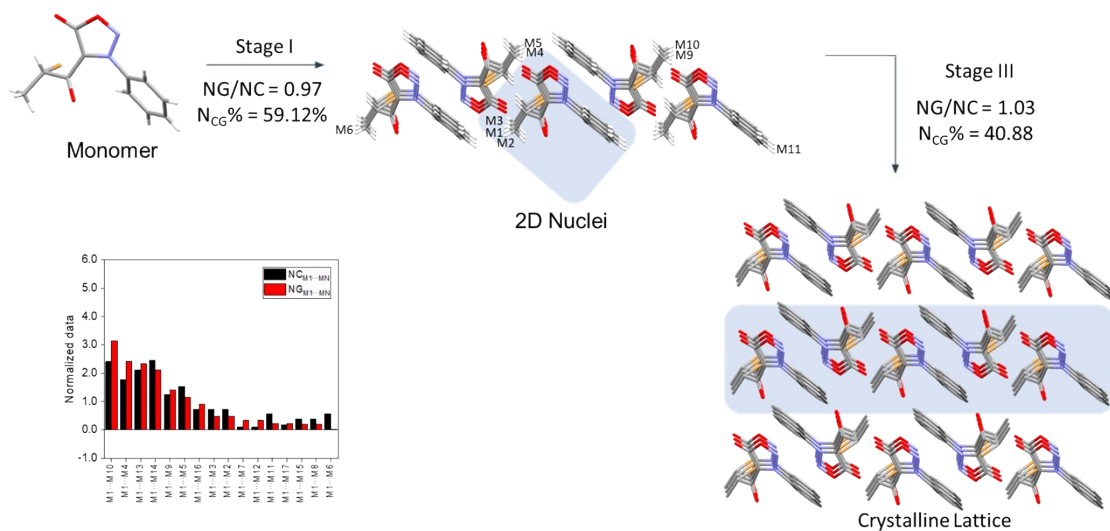

Figure S28 Crystallization mechanism of compound **3**

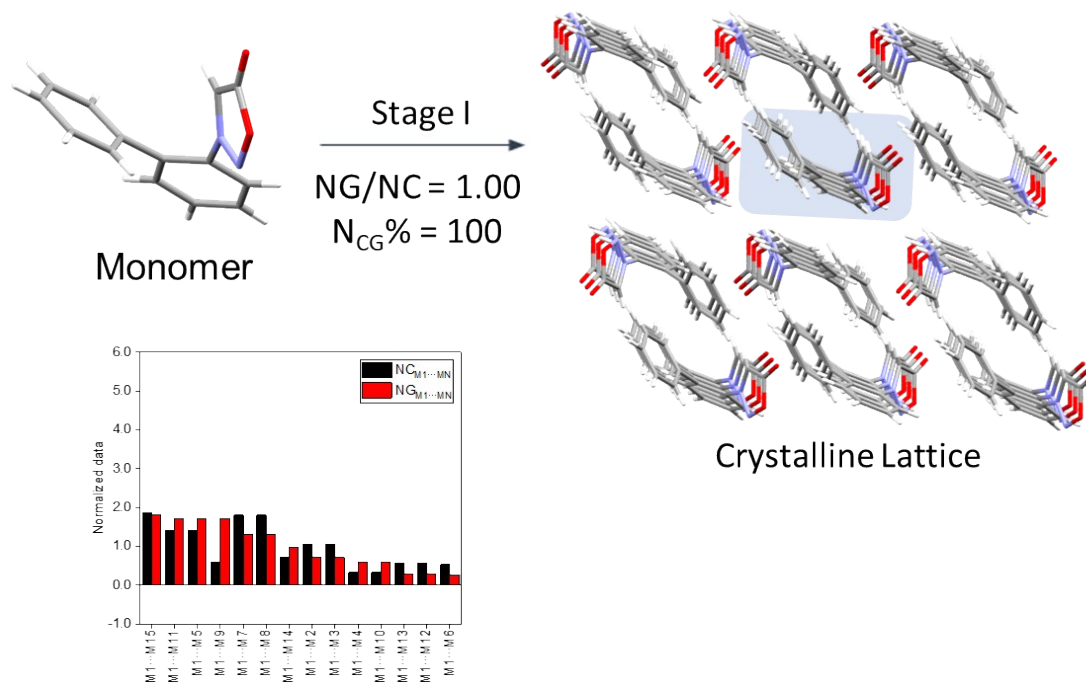

Figure S29 Crystallization mechanism of compound **4**

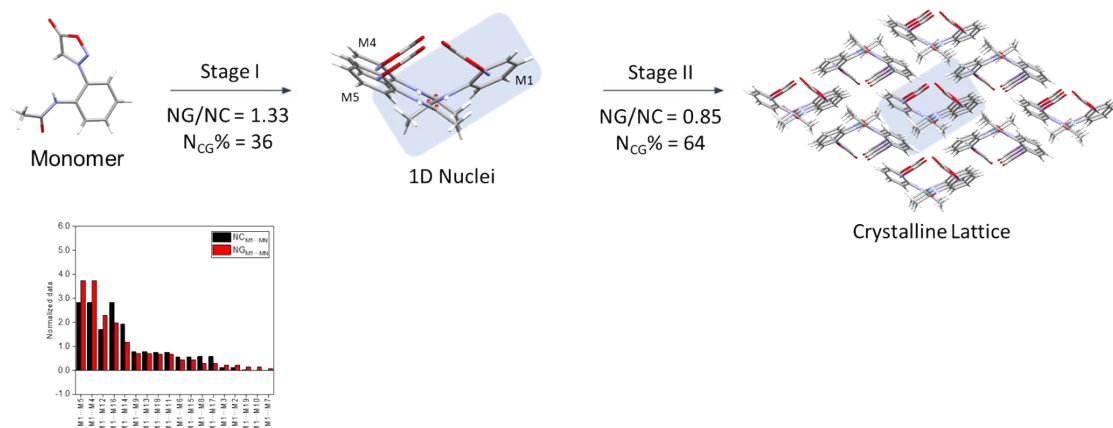

Figure S30 Crystallization mechanism of compound **5**

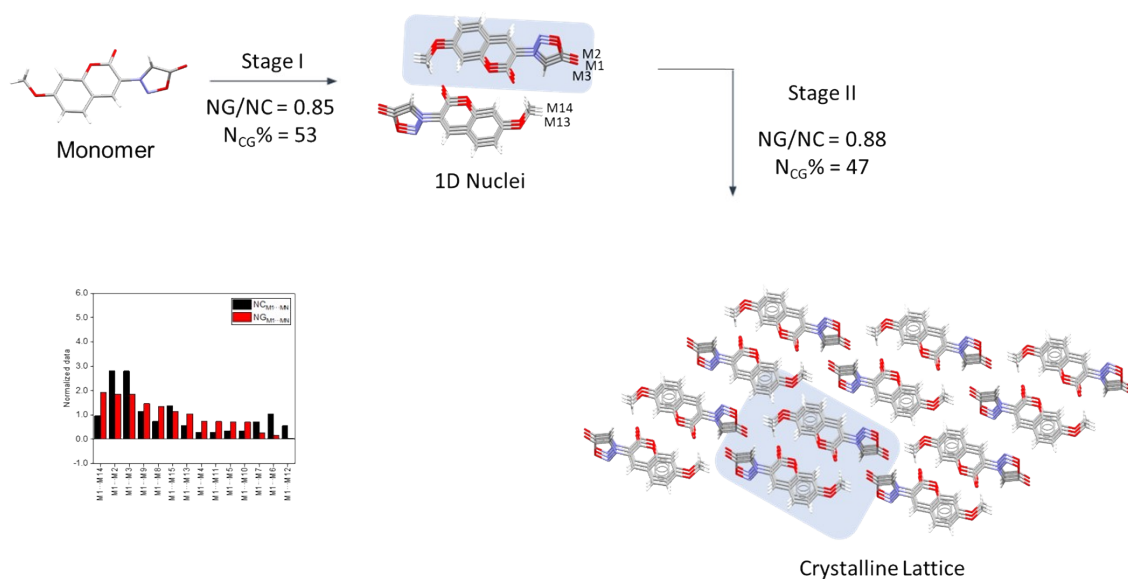

Figure S31 Crystallization mechanism of compound **6**

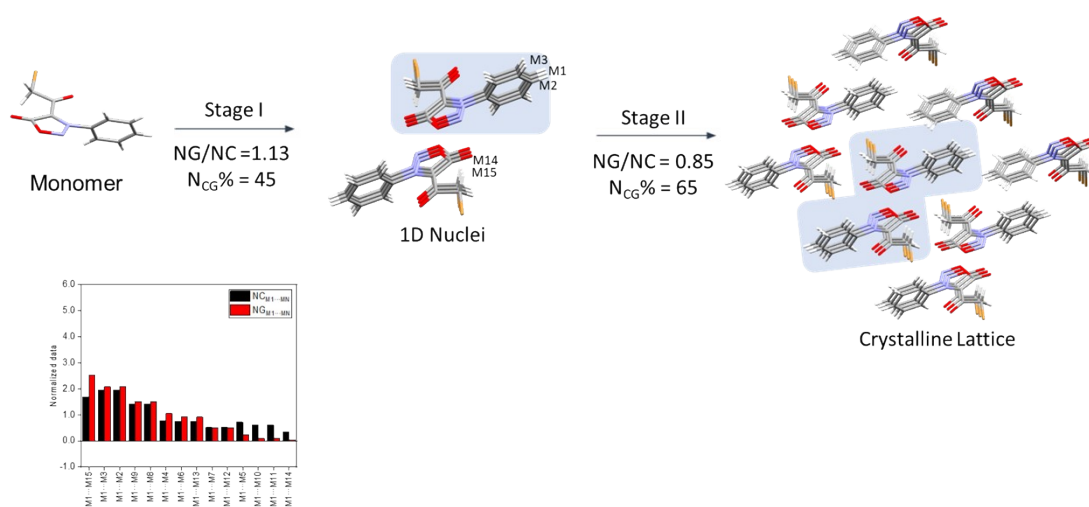

Figure S32 Crystallization mechanism of compound **8**

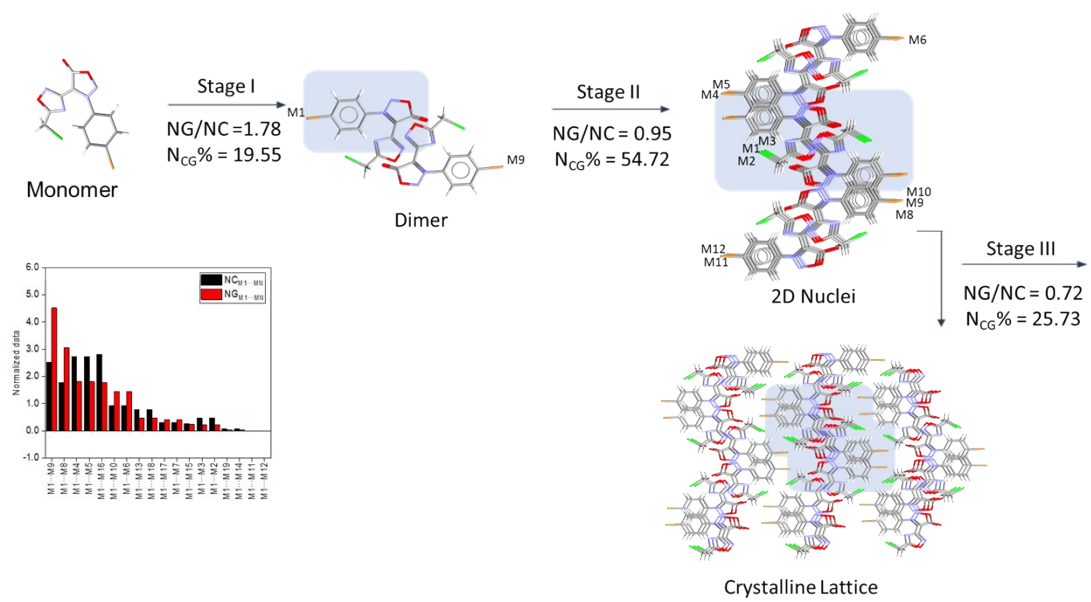

Figure S33 Crystallization mechanism of compound **9**

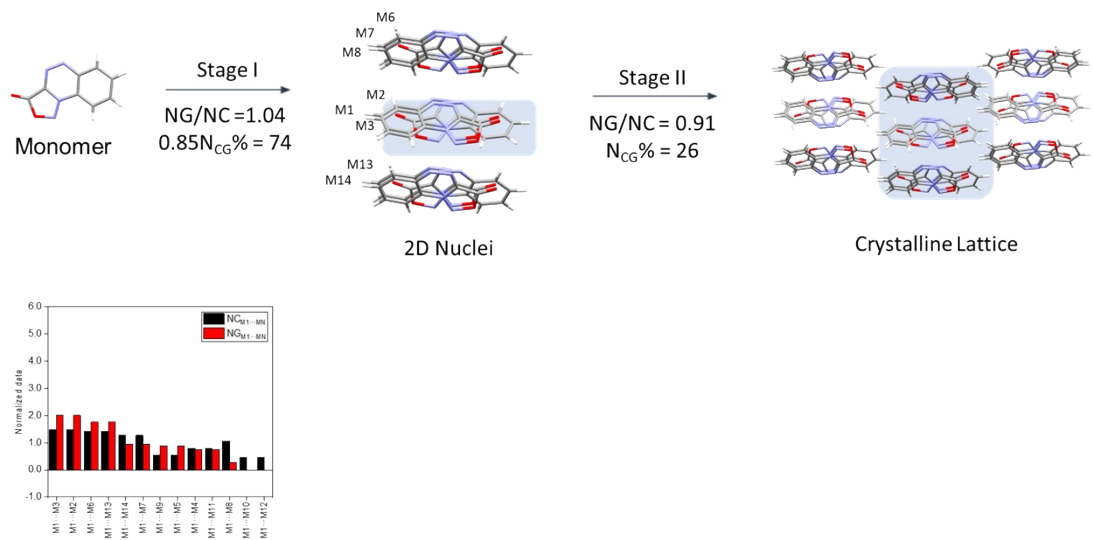

Figure S34 Crystallization mechanism of compound **10**



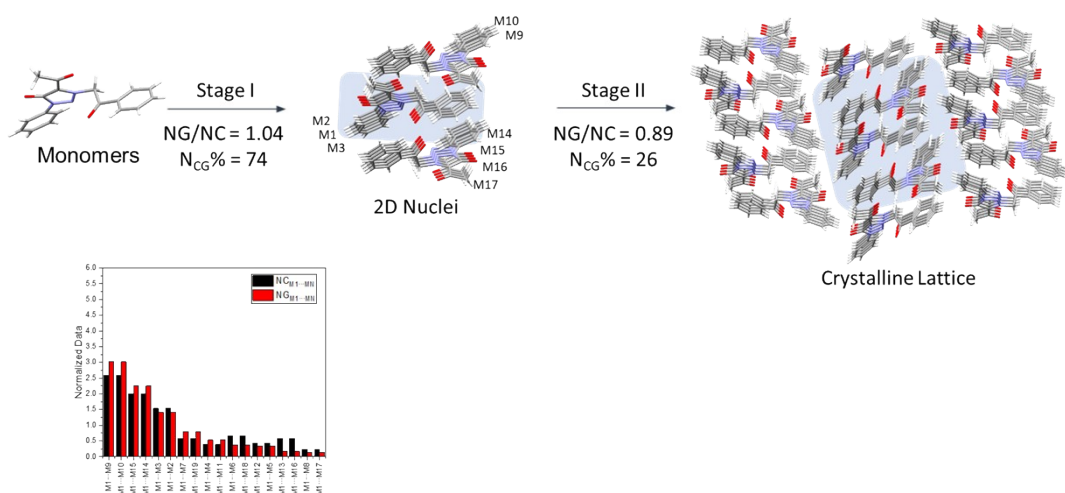

Figure S35 Crystallization mechanism of compound **11**

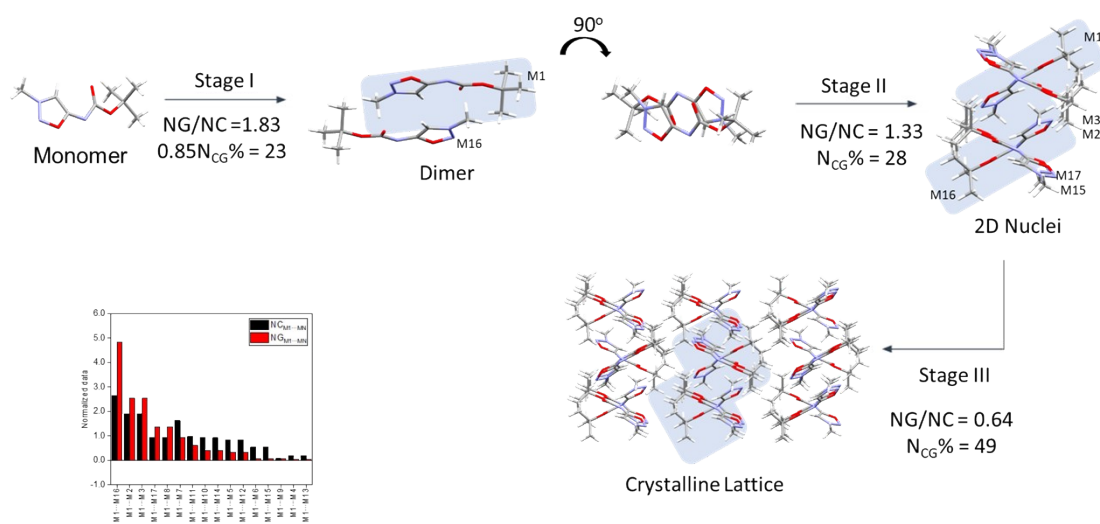

Figure S36 Crystallization mechanism of compound **12**

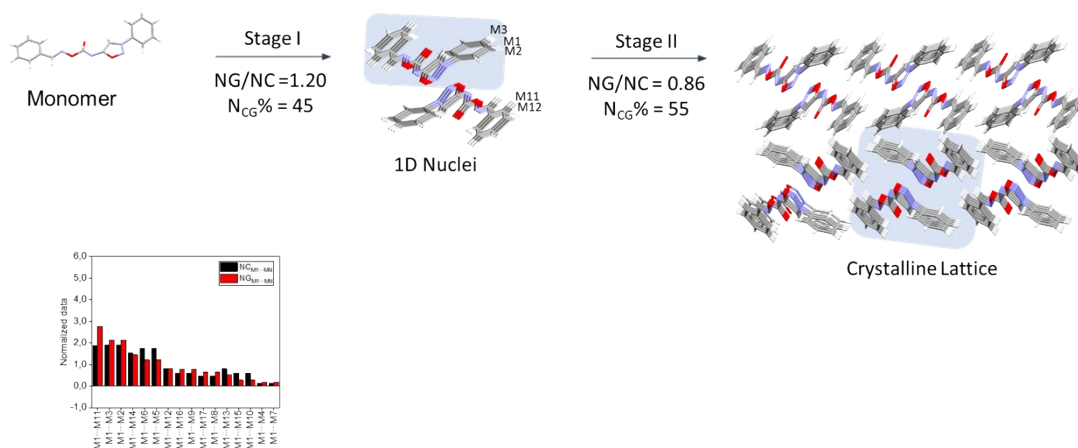

Figure S37 Crystallization mechanism of compound **13**

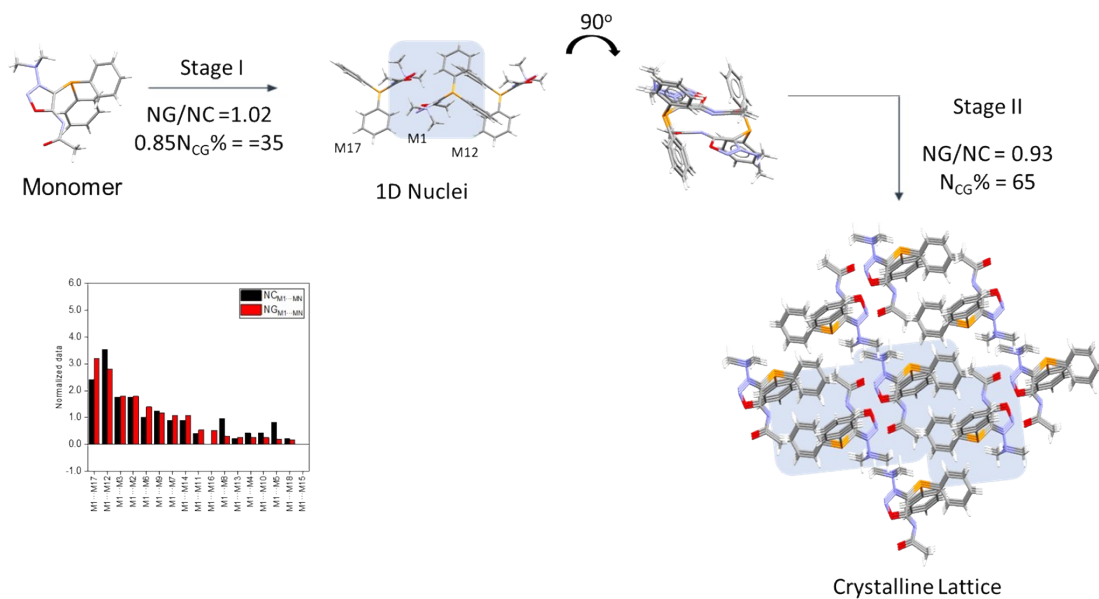

Figure S38 Crystallization mechanism of compound **14**

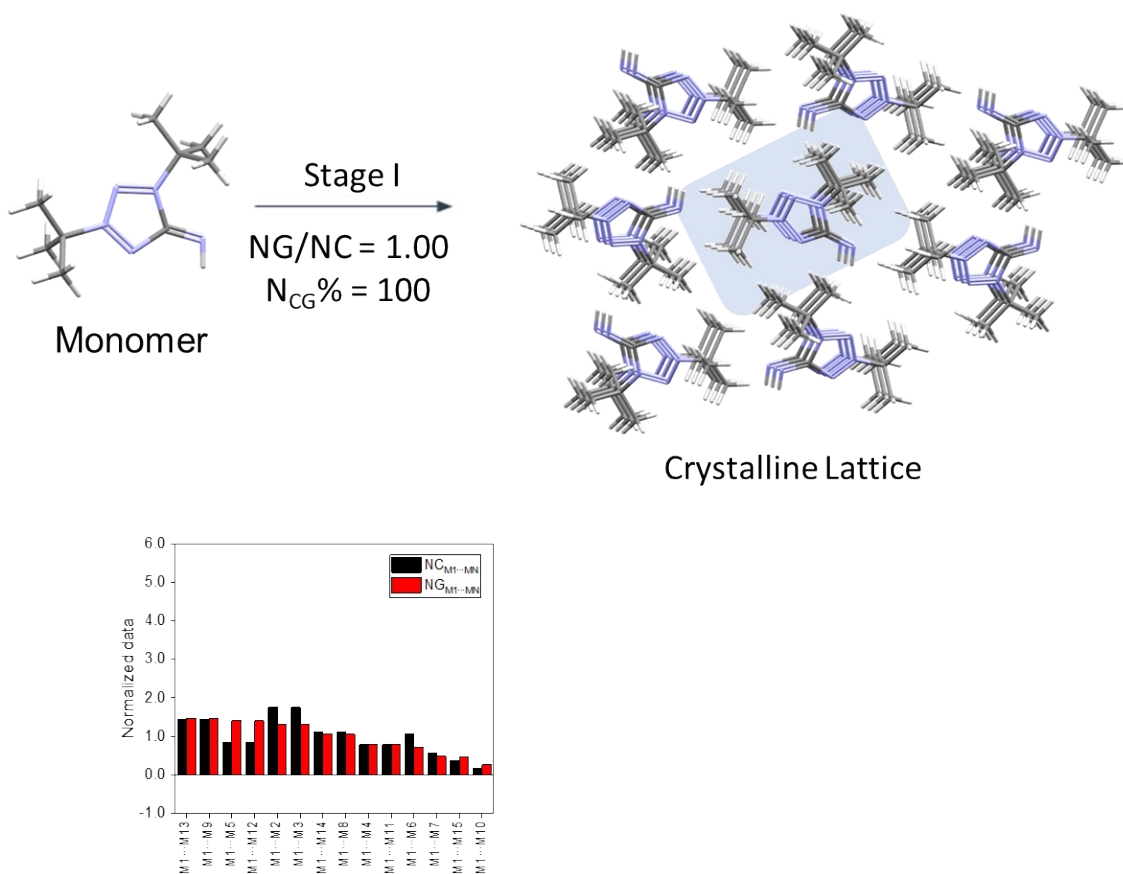

Figure S39 Crystallization mechanism of compound **15**

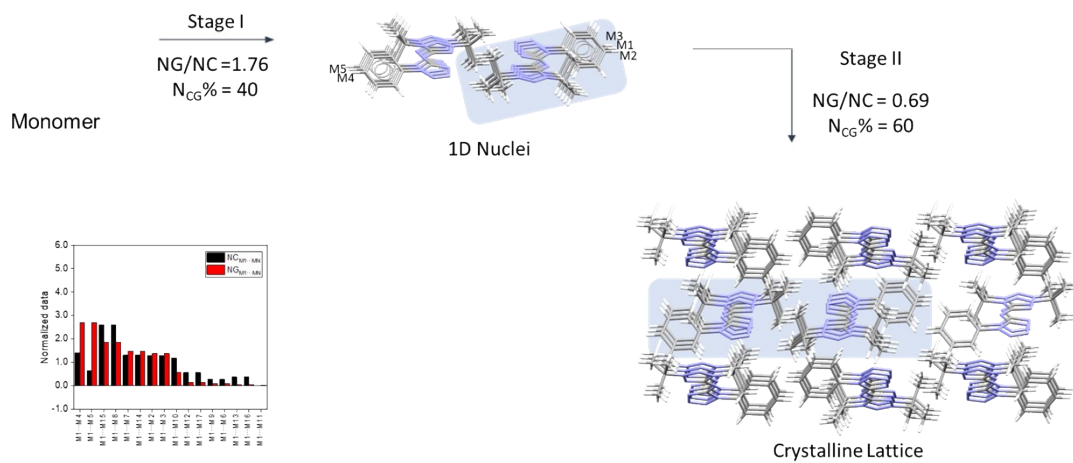

Figure S40 Crystallization mechanism of compound **16**

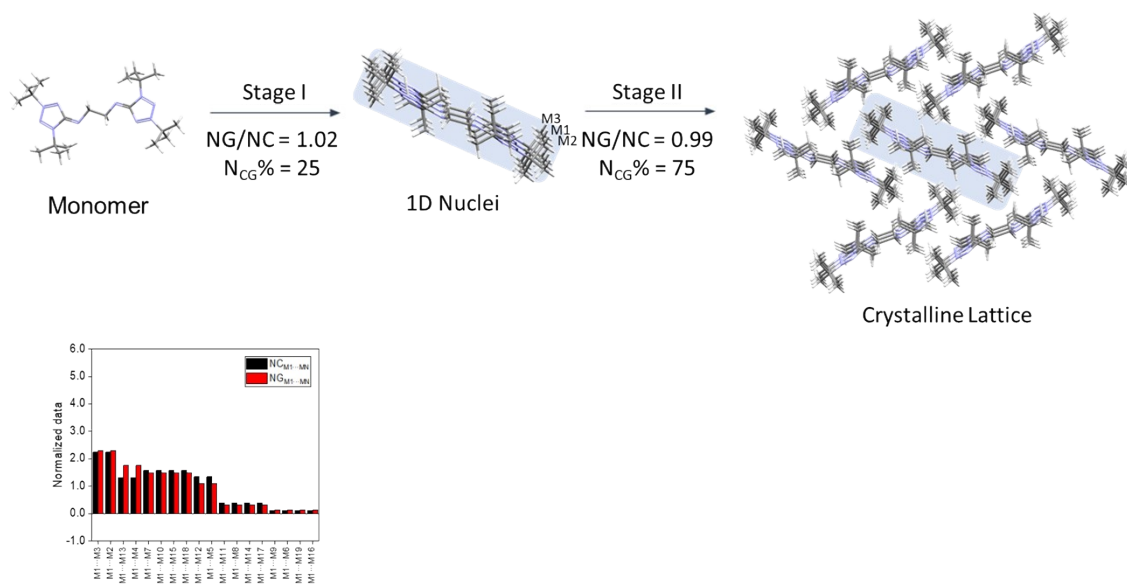

Figure S41 Crystallization mechanism of compound **17**

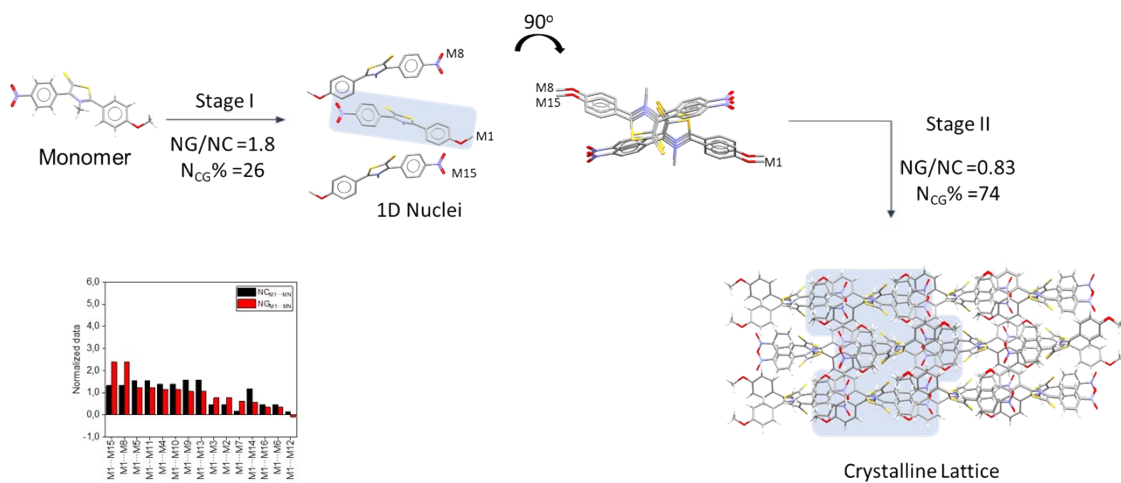

Figure S42 Crystallization mechanism of compound **19**

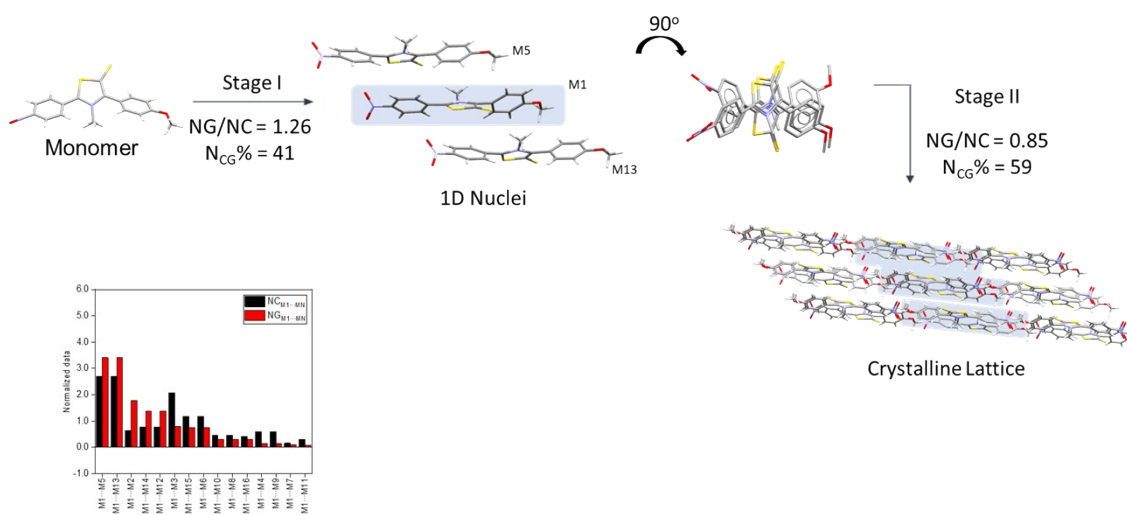

Figure S43 Crystallization mechanism of compound **20**

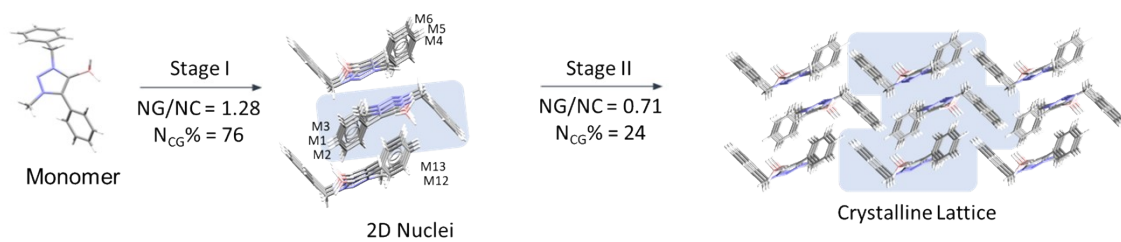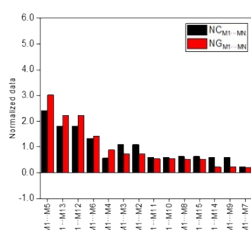

Figure S44 Crystallization mechanism of compound **21**

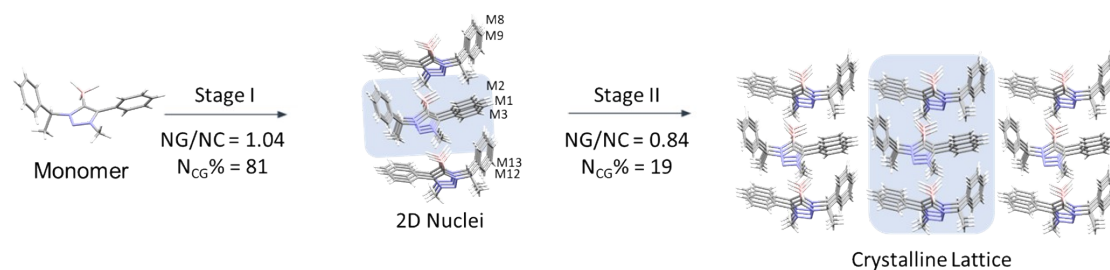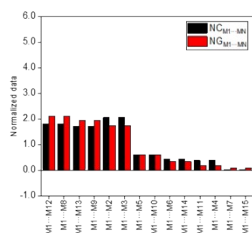

Figure S45 Crystallization mechanism of compound **22**

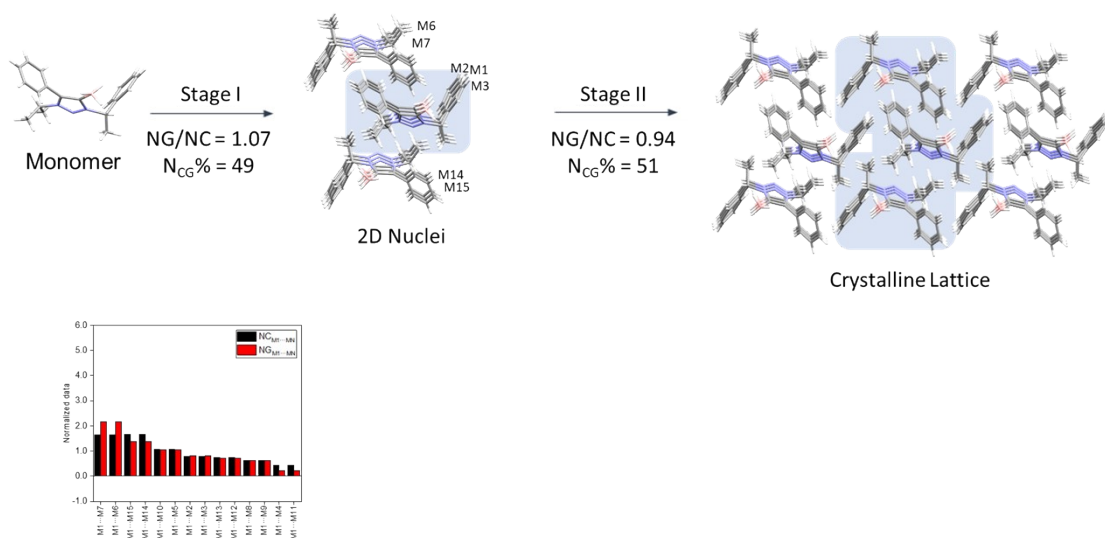

Figure S46 Crystallization mechanism of compound **23**

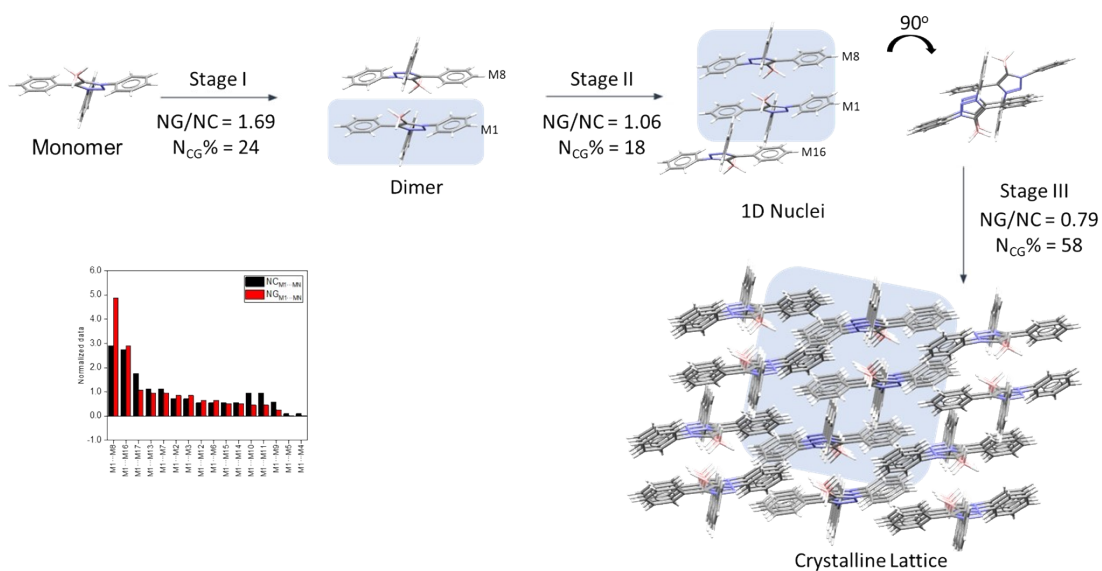

Figure S47 Crystallization mechanism of compound **24**

## 7. Molecular Electrostatic Potential (MEP)

Table S28 Molecular Electrostatic Potential of the most energetic dimers of structures **3-6, 8-18, 20-23**.

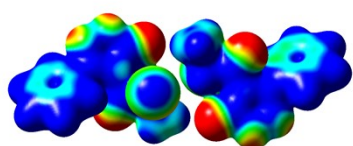

M1...M4

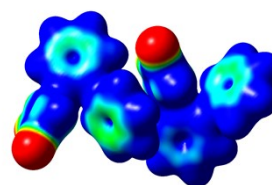

M1...M11

3

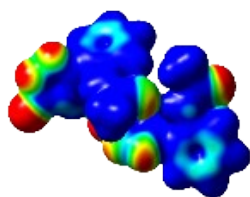

M1...M5

5

4

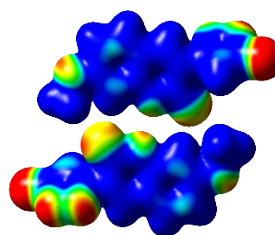

M1...M14

6

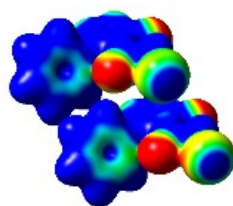

M1...M3

8

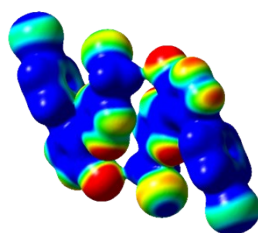

M1...M8  
Most Stabilizing Dimer

9

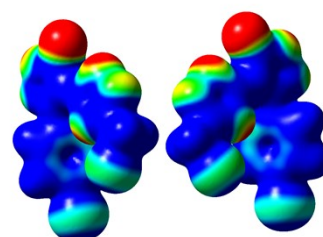

M1...M11  
Most Destabilizing Dimer

9

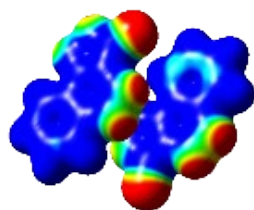

M1...M3  
Most Stabilizing Dimer

10

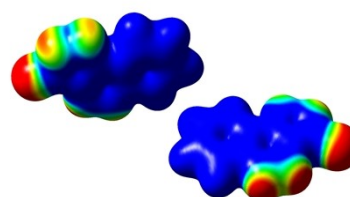

M1...M10  
Most Destabilizing Dimer

10

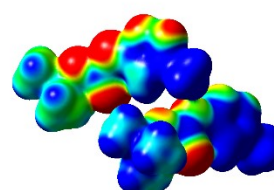



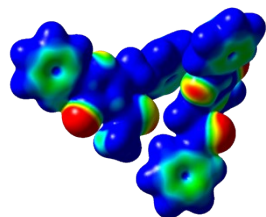

M1...M9

**11**

M1...M2

**12**

---

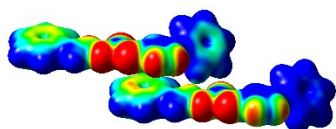

M1...M3

**13**

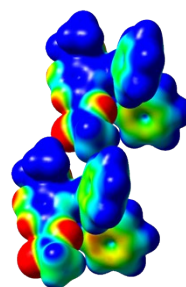

M1...M7

**14**

---

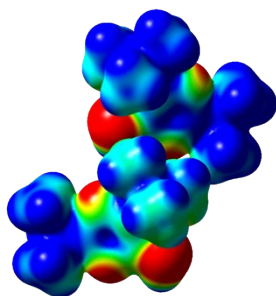

M1...M9

**15**

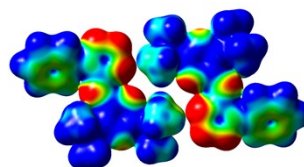

M1...M5

**16**

---

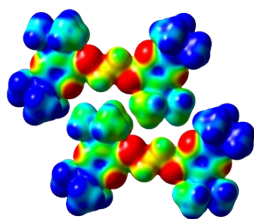

M1...M2

**17**

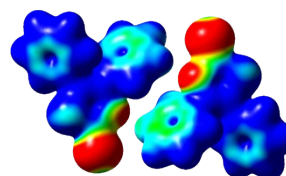

M1...M12

**18**

---

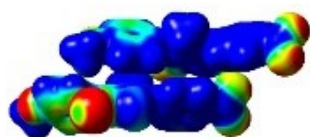

M1...M13

**20**

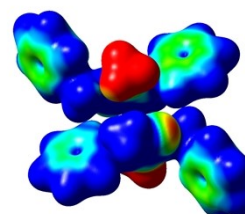

M1...M5

**21**

---







---

|       |      |          |          |        |         |        |         |        |
|-------|------|----------|----------|--------|---------|--------|---------|--------|
| 7     | CH-H | 0.004354 | 0.096795 | -0.001 | 0.00296 | -0.002 | 4.87499 | -2.18  |
| Total |      | 0.027870 |          |        |         |        |         | -12.59 |

---

## 9. References

1. P. F. de Athayde-Filho, J. M. and A. M. Simas, Synthesis, Characterization and Evaluation of the Activity of Ten Mesoionic Compounds Against Microorganisms, Acta. Farm. Bonaerense, **1999**, 18, 17-22.
